# Supplementary material for: GhNAC83 inhibits corm dormancy release by regulating ABA signaling and cytokinin biosynthesis in Gladiolus hybridus
Source: PubMed Central journal article supplement (PMC6382327; doi:10.1093/jxb/ery428), 2018-12-05
Supplement: ery428_suppl_supplementary_figures_s1-s6_table_s1.pdf [file ery428_suppl_supplementary_figures_s1-s6_table_s1.pdf]

# SUPPLEMENTARY DATA

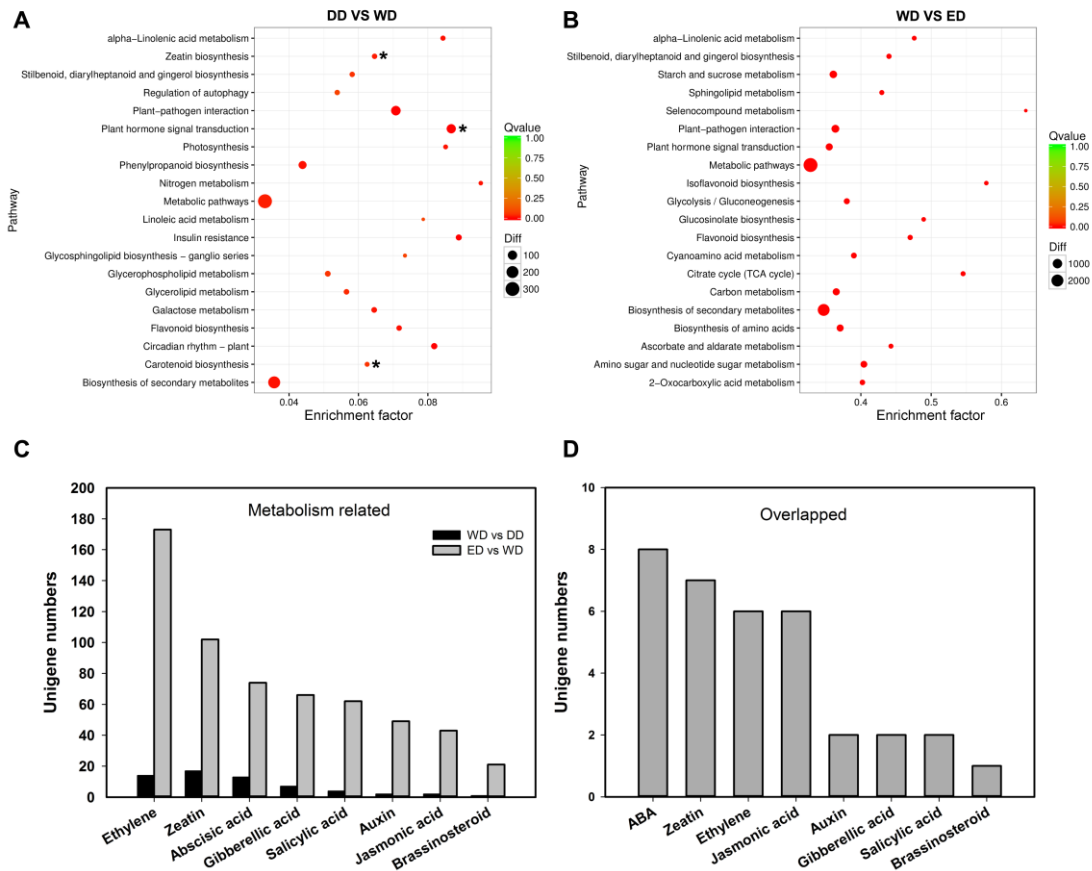

**Figure S1** Gene Ontology (GO) enrichment analysis. GO-term enrichments in WD (weak dormancy) versus DD (deep dormancy) (A) and ED (ecodormancy) versus WD (B) were generated using BLAST2GO. Only the top 20 most strongly represented pathways were displayed in the diagram. The degree of pathway enrichment was represented by an enrichment factor, the Qvalue, and the number of unigenes enriched in the pathway (Diff). The enrichment factor indicates the ratio of differential expression unigenes enriched in this pathway to the total number of annotated unigenes in this pathway. The names of the pathways are listed along the y-axis. The Qvalue indicates the corrected P-value, ranging from 0 and 1, and a Qvalue closer to 0 indicates more enrichment. C, The distribution of hormone metabolism DEGs (differentially expressed genes) during dormancy release. D, Overlapped DEGs of Hormone metabolism in WD vs DD and ED vs WD. DEGs when a cutoff ratio of  $\text{Log}_2 < -1$  or  $> 1$ , and q value  $< 0.05$ .

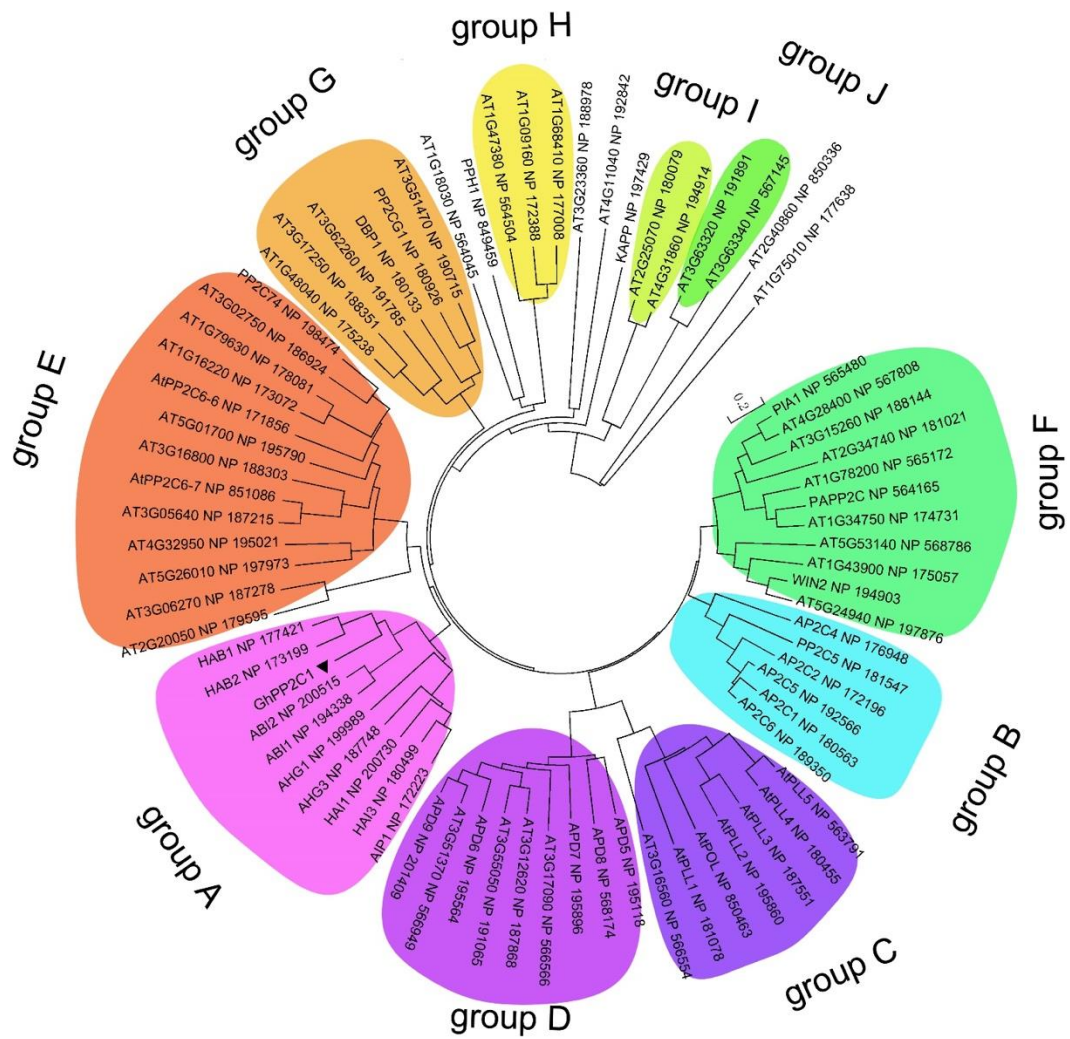

**Figure S2** Alignment of GhPP2C1 with PP2C family in Arabidopsis. Phylogenetic relationships among GhPP2C1 (black triangle) and Arabidopsis PP2C proteins. GhPP2C1 belongs to PP2C1 group A.

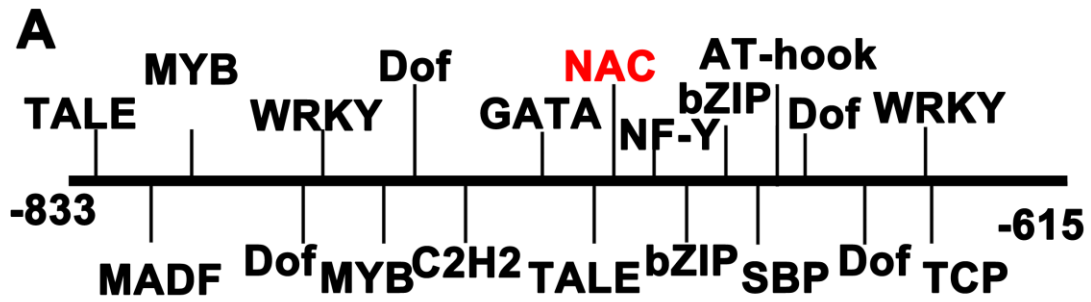

**B**

GhPP2C1 promoter sequence for Y1H:

CTCTGACAGGGACGTTAACCCCGCACGCCGTTAAACATAAGTGGGCGCCGCTTTTCCTGACTGGGTGATTCCATGGGTG  
 AAAGGTTTCCG**GTGCAC**TACGGAGAAGAGAAGAT**CGTGACATGTGC**TAAATTGGGGTGGACACGTACGCATAAATACTT  
 TAAATGCGCTATTGCTGGCGGAGTTTACAAAGACAAGTCAGGGCCCCACCAGAGCTAACG

GhPP2C1 mutant promoter sequence:

CTCTGACAGGGACGTTAACCCCGCACGCCGTTAAACATAAGTGGGCGCCGCTTTTCCTGACTGGGTGATTCCATGGGTG  
 AAAGGTTTCCGGg**GccT**ACGGAGAAGAGAAGAT**GccGAcTTGC**TAAATTGGGGTGGACACGTACGCATAAATACTTT  
 AAATGCGCTATTGCTGGCGGAGTTTACAAAGACAAGTCAGGGCCCCACCAGAGCTAACG

     NAC binding site           mutant site

**Figure S3** Predicted transcription factor binding sites in the GhPP2C1 promoter (-833 to -615 bp) for Yeast one hybrid. A. Predicted transcription factor binding sites. B. Mutagenesis of NAC binding site in the GhPP2C1 promoter.

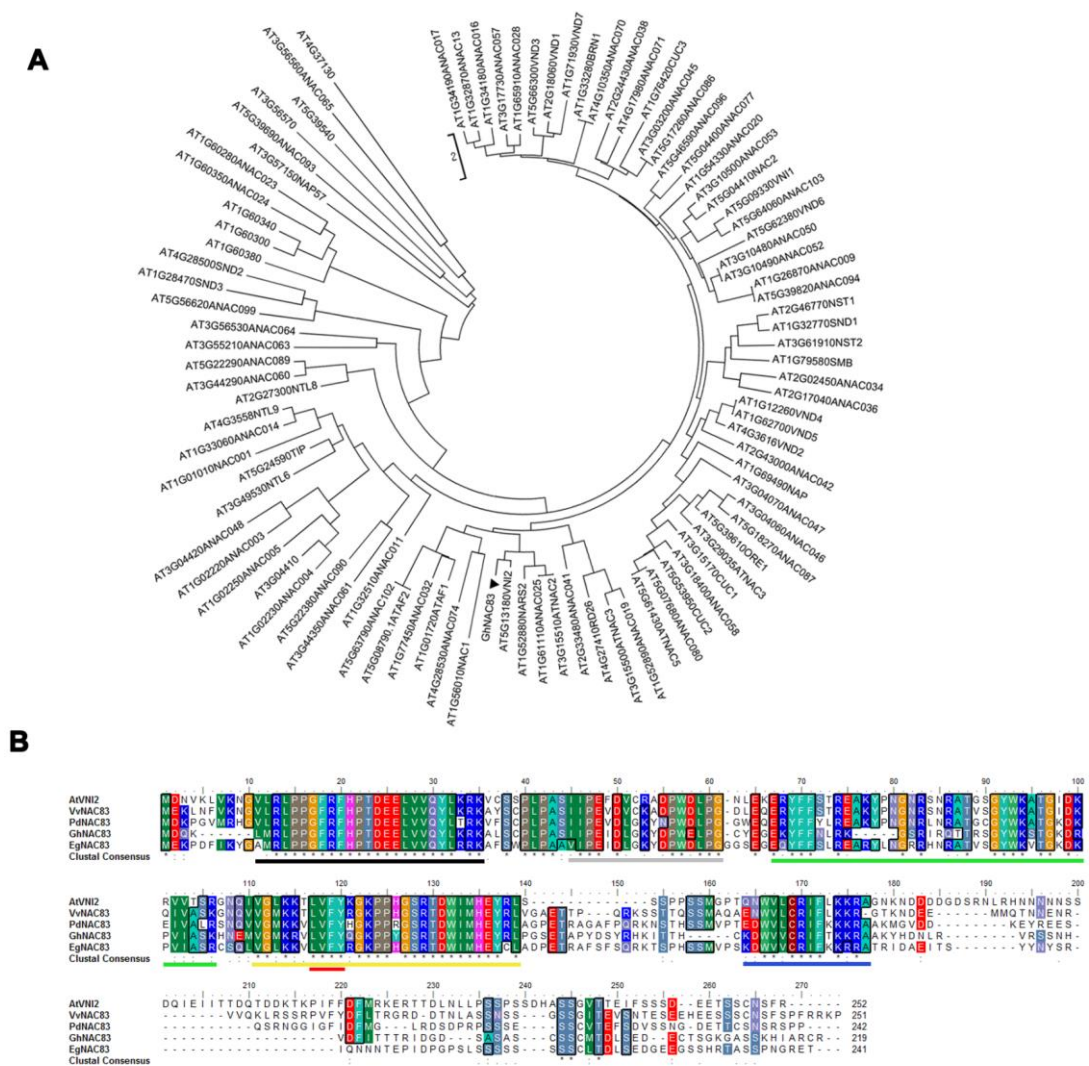

**Figure S4** Phylogenetic analysis of GhNAC83. A, Phylogenetic relationships among GhNAC83 (black triangle) and Arabidopsis NAC proteins. B, Sequence alignment of GhNAC83 with its homologs from *Arabidopsis thaliana* (AtVNI2), *Vitis vinifera* (VvNAC83; XP\_002264588), *Phoenix dactylifera* (PdNAC83; XP\_010907664) and *Elaeis guineensis* (EgNAC83; XP\_010909195). The conserved A to E domains are indicated by a black, gray, green, yellow and blue lines, respectively. The red line indicates the 'LVFY' repression motif.

GhIPT promoter T2 sequence for Y1H:

**TCGTAT**AGCTTTCCGACTTCAAATACTCTCATTCAACAATGGCATTGCTTGGCACAC  
CGGCTACTAACACAAGCTCTTCAAACTTTTTGGGAAGAACTAAACAGTCCACCTT**CAC**  
**GCAT**GAACTTGCCAACATAAACTAAAACGAGGTTTACTTCAATTTTGCTTTTGGAGT  
GATGTTGTAACAGTATAACTAATCATAG

GhIPT mutant promoter T2 sequence:

**TCcTA**AGCTTTCCGACTTCAAATACTCTCATTCAACAATGGCATTGCTTGGCACAC  
CGGCTACTAACACAAGCTCTTCAAACTTTTTGGGAAGAACTAAACAGTCCACCTT**CcC**  
**GCAT**GAACTTGCCAACATAAACTAAAACGAGGTTTACTTCAATTTTGCTTTTGGAGT  
GATGTTGTAACAGTATAACT

Figure S5 Mutagenesis of NAC binding site in the GhIPT promoter.

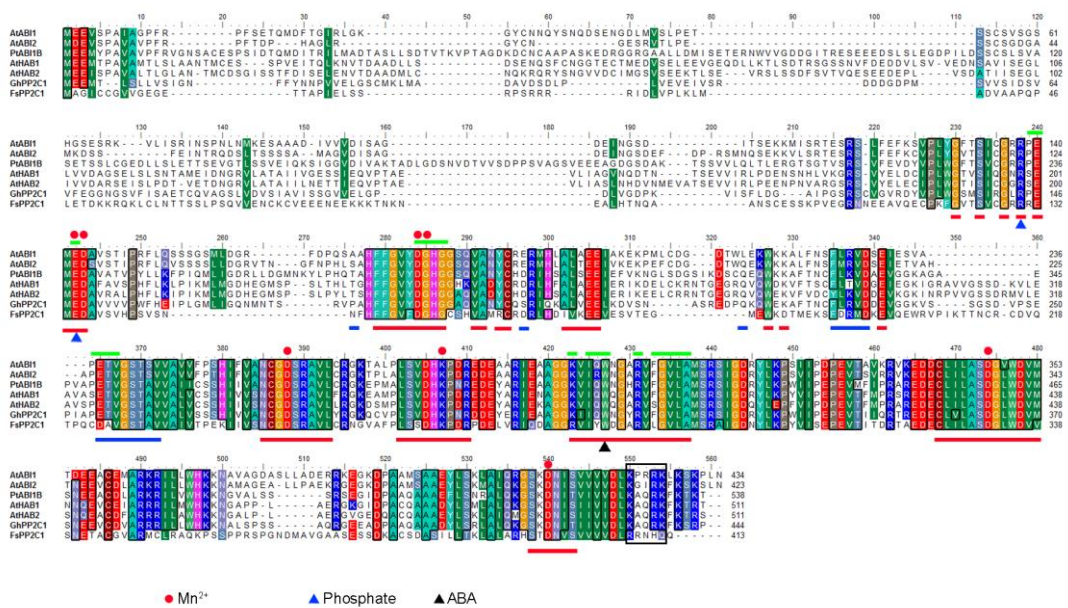

**Figure S6** Sequence alignment of GhPP2C1 with its homologs. Alignment of GhPP2C1 with four group A members in Arabidopsis (AtABI1, AtABI2, AtHAB1 and AtHAB2), FsPP2C1 (*Fagus sylvatica*; CAB90633.1) and PtABI1B (*Populus tremula*; CAM84257). Black box indicates the NLS-like nuclear localization sequence motif at the C-terminus; red lines indicate the amino acid residues involved in the interaction with ABA receptors (green lines indicate PYLs interaction); blue lines indicate the amino acid residues involved in the de-phosphorylation. The red dot, blue triangle and black triangle stand for the contact point with metal, phosphate and ABA, respectively.

| <b>Table S1</b> Primer sequences used in this study |                                        |                                                  |
|-----------------------------------------------------|----------------------------------------|--------------------------------------------------|
| <b>Primer</b>                                       | <b>Forward sequence (5'-3')</b>        | <b>Reverse sequence (5'-3')</b>                  |
| <b>CDS cloning</b>                                  |                                        |                                                  |
| GhPP2C1-CDS                                         | ATGGAGGAAATGACATTGTCTC<br>TGC          | TTAAGGTCTGCTCTTGAAC <del>TTT</del> CTC           |
| GhNAC83-CDS                                         | ATGGATCAGAAGCTCATGAGAT<br>TG           | CTAGCGACACCGAGCAATGTGC                           |
| <b>Virus-induced gene silencing (VIGS)</b>          |                                        |                                                  |
| TRV1                                                | TTACAGGTTATTTGGGCTAG                   | CCGGGTTCAATTCCTTATC                              |
| TRV2                                                | TGGGAGATGATACGCTGTT                    | CCTAA <del>AACTT</del> CAGACACG                  |
| GhPP2C1/TRV2                                        | GCTCTAGACAACGAACGAGAG<br>AAGATGAGT     | GGGGTACCCTCATACAACA <del>ACT</del> TAC<br>AGCCCC |
| GhNAC83/TRV2                                        | CGCGGATCCCAATCGAATTGGT<br>CGGAGGT      | CCGCTCGAGCTCTCTCGCTAATGT<br>CATTTG               |
| GhIPT/TRV2                                          | CGCGGATCCTATGGTAGGATCT<br>ACTCACTGA    | CCGCTCGAGGCAAATAGGCTCATA<br>TATATTCTC            |
| GhCYP735A/TRV2                                      | CGCGGATCCGTCGGAGTACCC<br>TTCAGCAA      | CCGCTCGAGGGTCCAAGTTAGGGC<br>AAGTC                |
| <b>Qrt-PCR</b>                                      |                                        |                                                  |
| GhACTIN-QRT                                         | ACTGCAGAGCGGGAAATTGT                   | CCAATCAGGGATGGCTGGAA                             |
| GhPP2C1-QRT                                         | CGAGATCGTGTCCAGGGATG                   | ACCCCACTGCTAATGACAGC                             |
| GhdUTPase-QRT                                       | TTATGCCCGCATCGCTCCAA                   | GACA <del>ACT</del> CCCACCGGTCCAC                |
| GhNAC83-QRT                                         | AGATTGCCACCTGGCTTCCG                   | CGACAGCGCCTTCTCTTGA                              |
| GhLEA-QRT                                           | TCCGTTATCGCCAAGTCCAA                   | CGGATCCATCTCGACAACCC                             |
| GhRD29B-QRT                                         | GGGACGTCAGTGAAGGAGTT                   | TCTGATCCGTTGTCTCTTGC                             |
| GhIPT-QRT                                           | GGACTCCGGCAAGTTCCTCA                   | GTTGAATTGCGTGGCGAGGT                             |
| GhCYP735A-QRT                                       | CGACGAGGGAGCTTGTGGAT                   | CCTCCTCCCTTAGCCGCTTC                             |
| <b>Subcellular localization</b>                     |                                        |                                                  |
| GhNAC83/Pcambia1300-G<br>FP                         | TCCCCCGGGATGGATCAGAA<br>GCTCATGAGATTG  | GGGGTACC <del>CG</del> GACACCGAGCAAT<br>GTGC     |
| <b>Transactivation domain analysis</b>              |                                        |                                                  |
| GhNAC-FL/Pgbkt7                                     | GGAATTCCATATGATGGATCAG<br>AAGCTCATGAGA | TCCCCCGGGCGACACCGAGCAAT<br>GTGC                  |
| GhNAC-NP/Pgbkt7                                     | GGAATTCCATATGATGGATCAG<br>AAGCTCATGAGA | TCCCCCGGGCCTTGGTAGAAGAC<br>TAGAACCCT             |
| GhNAC-CP/Pgbkt7                                     | GGAATTCCATATGAAGCCTCCC<br>TATGGGTCT    | TCCCCCGGGCGACACCGAGCAAT<br>GTGC                  |
| GhNAC-CT/Pgbkt7                                     | GGAATTCCATATGGCAAAATAC<br>CATGATAATCT  | TCCCCCGGGCGACACCGAGCAAT<br>GTGC                  |
| <b>Promoter cloning and analysis</b>                |                                        |                                                  |
| GhPP2C1-hitail-R1                                   | CCAATCGACCTTGACATTGCAA                 |                                                  |

|                                     |                                                                |                                                             |
|-------------------------------------|----------------------------------------------------------------|-------------------------------------------------------------|
|                                     | GAAC                                                           |                                                             |
| GhPP2C1-hitail-R2                   | CCACTGGATGATCTTGCCCCCA<br>GCA                                  |                                                             |
| GhPP2C1-hitail-R3                   | CTTGCCCCCAGCAGCCTCAATC<br>CG                                   |                                                             |
| GhPP2C1-Promoter-P0/Pc<br>ambia1391 | CCCAAGCTTAGATTAAGAGTAT<br>GGAGTATAC                            | TCCCCGGGCCCTTCCCCTCCTCA<br>AGATA                            |
| GhPP2C1-Promoter-P1/Pc<br>ambia1391 | CCCAAGCTTCTCTGACAGGGA<br>CGTTAAC                               | TCCCCGGGCCCTTCCCCTCCTCA<br>AGATA                            |
| GhPP2C1-Promoter-P2/Pc<br>ambia1391 | CCCAAGCTTTTTCCGGTTGGTG<br>GGGCCCA                              | TCCCCGGGCCCTTCCCCTCCTCA<br>AGATA                            |
| <b>Yeast one-hybrid</b>             |                                                                |                                                             |
| pDEST-GAD424                        | CTATTCGATGATGAAGATACCC<br>C                                    | CGTTTTAAACCTAAGAGTCAC                                       |
| GhPP2C1<br>pro/pDESTHISi-2          | ggggacaactttgtatagaaaagtgcCT<br>CTGACAGGGACGTTAACC             | ggggactgctttttgtacaaactgcCGTTAGC<br>TCTGGTGGGGCCC           |
| GhNAC83/Pdestgad424                 | ggggacaagttgtacaaaaagcaggctc<br>cATGGATCAGAAGCTCATGAGA<br>TTG  | ggggaccactttgtacaagaaagctgggtTCA<br>GCGACACCGAGCAATGTGC     |
| GhbZIP1/Pdestgad424                 | ggggacaagttgtacaaaaagcaggctc<br>cATGGACCAGAGGAAGAGGA           | ggggaccactttgtacaagaaagctgggtTCA<br>GAACTGCAACATATCGGCCG    |
| GhWRKY40/Pdestgad424                | ggggacaagttgtacaaaaagcaggctc<br>cATGGAGGAGGTGGAGGAGGC          | ggggaccactttgtacaagaaagctgggtTCA<br>GGTAGTGGCCGACTGGGTG     |
| GhMYB1R1/Pdestgad424                | ggggacaagttgtacaaaaagcaggctc<br>cATGACGAGAAGGTGCTCCCAT<br>TG   | ggggaccactttgtacaagaaagctgggtTCAT<br>GTTTGGGCCACTTGGGGT     |
| GhAPL-like/Pdestgad424              | ggggacaagttgtacaaaaagcaggctc<br>cATGTTCTCTGGGTTGATTCAG         | ggggaccactttgtacaagaaagctgggtTAA<br>TTCAGTGCCTTCCGCTTC      |
| GhDof1.8/Pdestgad424                | ggggacaagttgtacaaaaagcaggctc<br>cATGGAGGAAGTGTGTCTTCT          | ggggaccactttgtacaagaaagctgggtTTAC<br>TCTCCTCTTCTCCAGATC     |
| GhbZIP60/Pdestgad424                | ggggacaagttgtacaaaaagcaggctc<br>cATGGAAGAAGTAGCTCTATCT<br>CAAG | ggggaccactttgtacaagaaagctgggtCTAA<br>GCAACAAGAACAACAAGG     |
| GhBPC1/Pdestgad424                  | ggggacaagttgtacaaaaagcaggctc<br>cATGGATGATCATGGGGGATTA<br>G    | ggggaccactttgtacaagaaagctgggtCGA<br>ACAAGTTTGTGACTATCAGGTAA |
| GhIPT-promoter-T1/pDEST<br>HISi-2   | ggggacaactttgtatagaaaagtgcGT<br>GAAAAATAATGTGGCACTGC           | ggggactgctttttgtacaaactgcTACATGC<br>AATATTTGTTGCACCAT       |
| GhIPT-promoter-T2/pDEST<br>HISi-2   | ggggacaactttgtatagaaaagtgcTC<br>GTATAGCTTTCCGACTTC             | ggggactgctttttgtacaaactgcCTATGAT<br>TAGTTATACTGTTACAACATC   |
| GhIPT-promoter-T3/pDEST<br>HISi-2   | ggggacaactttgtatagaaaagtgcTG<br>GTATCAATACATATATGGATGC<br>T    | ggggactgctttttgtacaaactgcTATGTTCT<br>CAGTGCATGGATTG         |



| <b>Mutant promoter</b>             |                                                         |                                                     |
|------------------------------------|---------------------------------------------------------|-----------------------------------------------------|
| GhPP2C1<br>pro/pDESTHISi-2F1       | ggggacaactttgtatagaaaagttgccCTCTGACAGGGACGTTAACC        |                                                     |
| GhPP2C1pro <sup>MUT</sup> -R1      | CggGATCTTCTCTTCTCCGTAGgGCcCCGGAAACCTTTCACCCATGG         |                                                     |
| GhPP2C1pro <sup>MUT</sup> -F2      | TACGGAGAAGAGAAGATCccGACcTtTGCTAAATTGGGGTGGACACG         |                                                     |
| GhPP2C1<br>pro/pDESTHISi-2F2       | ggggactgctttttgtacaaaactgCGTTAGCTCTGGTGGGGCCC           |                                                     |
| GhIPTpro <sup>MUT</sup> -T2F1      | ggggacaactttgtatagaaaagttgccTCcTATAGCTTTCGACTTC         |                                                     |
| GhIPTpro <sup>MUT</sup> - T2R1     | ATGCGgGAAGGTGGACTGTTTAGTTCT                             |                                                     |
| GhIPTpro <sup>MUT</sup> - T2F2     | AACTAAACAGTCCACCTTCcCGCATGAACTTGCCAACATA                |                                                     |
| GhIPTpro <sup>MUT</sup> - T2F2     | ggggactgctttttgtacaaaactgCGCTATGATTAGTTATACTGTTACAACATC |                                                     |
| <b>Dual-luciferase</b>             |                                                         |                                                     |
| GhIPT-promoter/pGreenII<br>LUC F/R | ctatagggcgaattgggtaccCCTTTTAA<br>TTTGTAGAGAGAGGAGTTTG   | tgTTTTggcgtcttccatggGGCCACTTAGTT<br>AATTACAAGTGTG   |
| GhIPTpro <sup>MUT</sup> -T2R-1     |                                                         | GCTATAgGAGCTCGATGTCTGGTT<br>GTCTGTAATTGGAATTAC      |
| GhIPTpro <sup>MUT</sup> -T2F1-1    | ACAGACAACCAGACATCGAGC<br>TCcTATAGCTTTCGACTTC            |                                                     |
| GhIPTpro <sup>MUT</sup> - T2R1     |                                                         | ATGCGgGAAGGTGGACTGTTTAGT<br>TCT                     |
| GhIPTpro <sup>MUT</sup> - T2F2     | AACTAAACAGTCCACCTTCcCG<br>CATGAACTTGCCAACATA            |                                                     |
| GhPP2C1p/pGreenII LUC<br>F/R       | ctatagggcgaattgggtaccAGATTAA<br>GAGTATGGAGTATAC         | tgTTTTggcgtcttccatggCCCTTCCCCTCC<br>TCAAGATA        |
| GhPP2C1pro <sup>MUT</sup> -R1      |                                                         | CggGATCTTCTCTTCTCCGTAGgGC<br>cCCGGAAACCTTTCACCCATGG |
| GhPP2C1pro <sup>MUT</sup> -F2      | TACGGAGAAGAGAAGATCccGA<br>CcTtTGCTAAATTGGGGTGGACA<br>CG |                                                     |
| GhNAC83/pGreenII SK<br>F/R         | ggcggccgctctagaactagtATGGATC<br>AGAAGCTCATGAGATTG       | cagcgaattgtaccgggcccCTAGCGACA<br>CCGAGCAATGTGC      |
