# Supplementary material for: GhNAC83 inhibits corm dormancy release by regulating ABA signaling and cytokinin biosynthesis in Gladiolus hybridus
Source: PubMed Central journal article supplement (PMC6382327; doi:10.1093/jxb/ery428), 2018-12-05
Supplement: ery428_suppl_supplementary_table_s2.pdf [file ery428_suppl_supplementary_table_s2.pdf]

Table S2 Overlapped different expression genes in all stages

| Gene ID     | WD VS DD |                     | ED VS WD |                     | Annotation                                                                                                         |
|-------------|----------|---------------------|----------|---------------------|--------------------------------------------------------------------------------------------------------------------|
|             | Fold     | Log <sub>2</sub> FC | Fold     | Log <sub>2</sub> FC |                                                                                                                    |
| GlaUn000047 | 249.43   | 1E-08               | 0.11     | 2.8E-05             | -                                                                                                                  |
| GlaUn000344 | 0.37     | 0.00148             | 0.09     | 2.5E-12             | -                                                                                                                  |
| GlaUn000487 | 15.19    | 0.00114             | 5.71     | 3.1E-05             | PREDICTED: Phoenix dactylifera probable calcium-binding protein CML14 (LOC103715953), mRNA                         |
| GlaUn000610 | 28.11    | 2.9E-05             | 0.36     | 0.02636             | PREDICTED: Elaeis guineensis uncharacterized LOC105039139 (LOC105039139), mRNA                                     |
| GlaUn000620 | 2.15     | 0.00471             | 2.07     | 0.02032             | PREDICTED: Brassica napus cellulose synthase-like protein D2 (LOC106387704), transcript variant X3, mRNA           |
| GlaUn000661 | 5.45     | 0.02125             | 2.88     | 0.01675             | PREDICTED: Vitis vinifera ethylene-responsive transcription factor 2 (LOC100254640), mRNA                          |
| GlaUn000832 | 33.29    | 3E-15               | 0.35     | 1E-05               | -                                                                                                                  |
| GlaUn001010 | 0.22     | 1.6E-07             | 0.05     | 1.4E-05             | -                                                                                                                  |
| GlaUn001151 | 0.31     | 0.01299             | 0.12     | 0.03667             | Triticum aestivum chromosome 3B, genomic scaffold, cultivar Chinese Spring                                         |
| GlaUn001284 | 0.35     | 0.0122              | 0.37     | 0.00948             | -                                                                                                                  |
| GlaUn001305 | 5.48     | 0.00024             | 0.41     | 0.00435             | -                                                                                                                  |
| GlaUn001526 | 0.41     | 0.02848             | 0.19     | 0.00298             | -                                                                                                                  |
| GlaUn001607 | 16.36    | 0.00317             | 7.74     | 0.0272              | -                                                                                                                  |
| GlaUn001981 | 0.38     | 9.8E-05             | 0.14     | 3.6E-07             | -                                                                                                                  |
| GlaUn002034 | 6.67     | 0.04248             | 4.35     | 0.0001              | -                                                                                                                  |
| GlaUn002092 | 0.04     | 0.04694             | 92.3     | 1.9E-10             | -                                                                                                                  |
| GlaUn002174 | 15.7     | 0.01335             | 0.16     | 0.01413             | -                                                                                                                  |
| GlaUn002297 | 0.47     | 0.03122             | 0.08     | 3.9E-09             | -                                                                                                                  |
| GlaUn002424 | 0.36     | 0.00836             | 0.47     | 0.02663             | -                                                                                                                  |
| GlaUn002649 | 0.26     | 0.0032              | 8.41     | 1.1E-06             | -                                                                                                                  |
| GlaUn002680 | 33.33    | 0.04405             | 11.05    | 1E-06               | PREDICTED: Elaeis guineensis transcription factor bHLH35 (LOC105050852), transcript variant X3, mRNA               |
| GlaUn002751 | 0.34     | 0.00149             | 0.24     | 5.1E-05             | -                                                                                                                  |
| GlaUn002805 | 14.27    | 1E-08               | 0.26     | 2.5E-05             | -                                                                                                                  |
| GlaUn002878 | 2.12     | 0.00202             | 0.15     | 1.2E-16             | -                                                                                                                  |
| GlaUn003102 | 15.48    | 8.5E-24             | 0.2      | 2.9E-14             | -                                                                                                                  |
| GlaUn003155 | 0.32     | 0.01118             | 0.15     | 4.2E-07             | -                                                                                                                  |
| GlaUn003482 | 3.43     | 0.00034             | 0.06     | 4.3E-17             | -                                                                                                                  |
| GlaUn003483 | 2.75     | 0.00127             | 0.04     | 4.6E-25             | -                                                                                                                  |
| GlaUn003573 | 0.42     | 0.01906             | 0.37     | 0.00096             | PREDICTED: Elaeis guineensis transmembrane 9 superfamily member 3-like (LOC105053145), transcript variant X2, mRNA |
| GlaUn003584 | 21.42    | 0.00488             | 0.18     | 0.0164              | -                                                                                                                  |
| GlaUn003678 | 29.92    | 4.3E-05             | 0.19     | 0.00277             | -                                                                                                                  |
| GlaUn003821 | 21.94    | 0.00121             | 0.11     | 0.00137             | -                                                                                                                  |
| GlaUn003867 | 2.44     | 0.00025             | 0.2      | 2.5E-12             | -                                                                                                                  |
| GlaUn003908 | 0.36     | 0.02097             | 0.24     | 0.00092             | -                                                                                                                  |
| GlaUn004050 | 0.31     | 0.01673             | 0.24     | 2.6E-07             | -                                                                                                                  |
| GlaUn004170 | 0.3      | 0.02778             | 0.16     | 0.00329             | -                                                                                                                  |
| GlaUn004231 | 2.07     | 0.00224             | 0.22     | 3.5E-12             | -                                                                                                                  |
| GlaUn004299 | 0.29     | 0.01127             | 0.02     | 3.3E-05             | -                                                                                                                  |
| GlaUn004310 | 6.21     | 0.01838             | 3.12     | 0.00014             | Cocos nucifera serine-threonine kinase STK6 mRNA, complete cds                                                     |
| GlaUn004335 | 0.39     | 0.01275             | 0.37     | 0.02374             | -                                                                                                                  |
| GlaUn004404 | 0.29     | 0.01325             | 9.43     | 5.3E-13             | -                                                                                                                  |
| GlaUn004602 | 5.85     | 0.01371             | 2.12     | 0.02199             | PREDICTED: Phoenix dactylifera arginine decarboxylase-like (LOC103697802), mRNA                                    |
| GlaUn004884 | 0.3      | 0.03675             | 0.17     | 0.01097             | PREDICTED: Nelumbo nucifera serine/arginine-rich splicing factor SR34A (LOC104593794), transcript variant X3, mRNA |
| GlaUn004903 | 28.75    | 3.9E-05             | 0.4      | 0.04497             | -                                                                                                                  |
| GlaUn004948 | 6.56     | 1.4E-11             | 0.06     | 3.4E-22             | -                                                                                                                  |
| GlaUn005054 | 0.36     | 0.03545             | 6.62     | 3.4E-11             | -                                                                                                                  |
| GlaUn005068 | 17.98    | 9.4E-30             | 0.17     | 1.4E-17             | -                                                                                                                  |
| GlaUn005131 | 0.4      | 0.01163             | 0.31     | 0.00013             | -                                                                                                                  |
| GlaUn005233 | 7.85     | 3.9E-05             | 2.34     | 0.01634             | -                                                                                                                  |
| GlaUn005676 | 0.37     | 0.00862             | 0.15     | 0.00032             | -                                                                                                                  |

|             |        |         |        |         |                                                                                                                                                  |
|-------------|--------|---------|--------|---------|--------------------------------------------------------------------------------------------------------------------------------------------------|
| GlaUn005862 | 20.12  | 6.7E-05 | 15.29  | 3.8E-06 | PREDICTED: Ricinus communis cysteine-rich and transmembrane domain-containing protein A (LOC8264908),                                            |
| GlaUn005863 | 18.47  | 0.00182 | 15.09  | 3.3E-06 | PREDICTED: Ricinus communis cysteine-rich and transmembrane domain-containing protein A (LOC8264908),                                            |
| GlaUn006476 | 7.26   | 0.00254 | 6.1    | 5.6E-05 | -                                                                                                                                                |
| GlaUn008009 | 6.18   | 1.2E-06 | 8.56   | 0.0024  | PREDICTED: Phoenix dactylifera arabinogalactan peptide 3-like (LOC103712951), mRNA                                                               |
| GlaUn008387 | 0.26   | 0.00443 | 0.08   | 0.00318 | -                                                                                                                                                |
| GlaUn008592 | 5.53   | 4.5E-06 | 2.91   | 0.00079 | -                                                                                                                                                |
| GlaUn009869 | 2.32   | 7.4E-05 | 0.21   | 4.5E-15 | -                                                                                                                                                |
| GlaUn010205 | 0.3    | 0.00151 | 0.23   | 0.00783 | -                                                                                                                                                |
| GlaUn011242 | 0.39   | 0.01507 | 0.3    | 0.00036 | Siraitia grosvenorii isopentenyl diphosphate isomerase mRNA, complete cds                                                                        |
| GlaUn011270 | 0.08   | 0.02732 | 217.44 | 7.9E-44 | Oryza sativa Indica Group cultivar RP Bio-226 chromosome 2 sequence                                                                              |
| GlaUn011460 | 7.33   | 0.02259 | 3.64   | 2.7E-05 | -                                                                                                                                                |
| GlaUn011930 | 0.35   | 0.0002  | 0.21   | 1.3E-08 | -                                                                                                                                                |
| GlaUn012767 | 6.22   | 0.00014 | 4.25   | 0.00132 | -                                                                                                                                                |
| GlaUn012786 | 0.28   | 0.0431  | 0.12   | 7.2E-08 | -                                                                                                                                                |
| GlaUn013154 | 0.39   | 0.00042 | 0.41   | 1.6E-05 | -                                                                                                                                                |
| GlaUn013538 | 0.31   | 0.00022 | 0.24   | 4.4E-05 | PREDICTED: Phoenix dactylifera isopentenyl-diphosphate Delta-isomerase I (LOC103705690), transcript variant X2,                                  |
| GlaUn013683 | 191    | 0.02404 | 3      | 0.02753 | -                                                                                                                                                |
| GlaUn014194 | 0.24   | 0.03655 | 0.1    | 0.03997 | -                                                                                                                                                |
| GlaUn014204 | 11.15  | 0.01275 | 2.68   | 0.01327 | -                                                                                                                                                |
| GlaUn014255 | 0.41   | 0.02008 | 0.18   | 1.4E-06 | -                                                                                                                                                |
| GlaUn014495 | 0.49   | 0.01533 | 0.39   | 8.2E-07 | Ipomopsis rubra ribulose-1,5-bisphosphate carboxylase/oxygenase large subunit (rbcL) gene, partial cds; chloroplast                              |
| GlaUn014989 | 0.19   | 0.01178 | 0.02   | 0.01628 | -                                                                                                                                                |
| GlaUn015261 | 4.72   | 0.00093 | 2.94   | 0.00065 | -                                                                                                                                                |
| GlaUn015334 | 0.43   | 0.04144 | 0.09   | 5.4E-08 | -                                                                                                                                                |
| GlaUn015525 | 0.29   | 0.03574 | 0.24   | 0.01655 | -                                                                                                                                                |
| GlaUn016004 | 2.15   | 0.00879 | 0.08   | 4.8E-17 | -                                                                                                                                                |
| GlaUn017111 | 456.33 | 0.02663 | 4.77   | 6.7E-07 | PREDICTED: Brassica napus probable CCR4-associated factor 1 homolog 11 (LOC106371662), mRNA                                                      |
| GlaUn017158 | 38.93  | 3.5E-26 | 0.23   | 1E-09   | -                                                                                                                                                |
| GlaUn017488 | 0.4    | 0.02951 | 0.2    | 2.7E-07 | PREDICTED: Phoenix dactylifera light-regulated protein-like (LOC103707811), mRNA                                                                 |
| GlaUn017827 | 0.46   | 0.01868 | 0.22   | 2.1E-09 | -                                                                                                                                                |
| GlaUn018187 | 0.36   | 0.04005 | 11.23  | 3.2E-34 | -                                                                                                                                                |
| GlaUn018188 | 0.36   | 0.03478 | 11.25  | 2.8E-34 | -                                                                                                                                                |
| GlaUn018555 | 4.87   | 0.01853 | 10.45  | 4.2E-18 | PREDICTED: Sesamum indicum peamaclein-like (LOC105159126). mRNA                                                                                  |
| GlaUn018753 | 0.3    | 0.0008  | 0.13   | 0.02187 | Gladiolus grandiflorus polyubiquitin (UBQ) gene, promoter region and partial cds                                                                 |
| GlaUn018933 | 9.45   | 6.2E-05 | 0.37   | 0.00402 | -                                                                                                                                                |
| GlaUn020755 | 5.77   | 1.1E-06 | 0.05   | 4.6E-14 | -                                                                                                                                                |
| GlaUn020756 | 5.49   | 6.9E-06 | 0.05   | 4.6E-13 | -                                                                                                                                                |
| GlaUn020822 | 9.21   | 0.00631 | 0.3    | 0.02145 | PREDICTED: Musa acuminata subsp. malaccensis uncharacterized LOC103970718 (LOC103970718), mRNA                                                   |
| GlaUn021295 | 5.53   | 0.0142  | 2.55   | 0.02343 | -                                                                                                                                                |
| GlaUn021441 | 0.2    | 0.0003  | 31.92  | 3E-38   | Ruta oreojasme clone RO62 microsatellite sequence                                                                                                |
| GlaUn021522 | 6.34   | 0.00354 | 4.31   | 0.00131 | PREDICTED: Musa acuminata subsp. malaccensis UDP-glucose 6-dehydrogenase 4-like (LOC103968572), transcript variant X2, mRNA                      |
| GlaUn021893 | 0.37   | 0.00078 | 0.12   | 4.1E-12 | PREDICTED: Elaeis guineensis phosphatidylinositol/phosphatidylcholine transfer protein SFH8-like (LOC105058769), transcript variant X3, misc_RNA |
| GlaUn021894 | 0.39   | 0.00798 | 0.24   | 1.3E-05 | PREDICTED: Elaeis guineensis phosphatidylinositol/phosphatidylcholine transfer protein SFH8-like (LOC105058769), transcript variant X3, misc_RNA |
| GlaUn022034 | 4.07   | 0.04602 | 10.55  | 2.3E-34 | PREDICTED: Musa acuminata subsp. malaccensis cytochrome c-like (LOC103983621), mRNA                                                              |
| GlaUn022103 | 0.3    | 0.0004  | 0.24   | 0.00026 | -                                                                                                                                                |
| GlaUn023070 | 0.18   | 0.02949 | 0.07   | 0.00437 | -                                                                                                                                                |

|             |       |         |        |         |                                                                                                                                                                         |
|-------------|-------|---------|--------|---------|-------------------------------------------------------------------------------------------------------------------------------------------------------------------------|
| GlaUn023163 | 2.68  | 0.01317 | 0.11   | 7.5E-09 | -                                                                                                                                                                       |
| GlaUn023645 | 0.33  | 0.00259 | 0.17   | 1.2E-05 | -                                                                                                                                                                       |
| GlaUn023646 | 0.29  | 3.1E-05 | 0.08   | 7.8E-11 | -                                                                                                                                                                       |
| GlaUn023752 | 0.39  | 9.1E-05 | 0.09   | 6.2E-16 | -                                                                                                                                                                       |
| GlaUn023844 | 0.49  | 0.03798 | 0.41   | 0.04184 | PREDICTED: Elaeis guineensis thioredoxin-like 1-2, chloroplastic (LOC105057263), mRNA                                                                                   |
| GlaUn023849 | 0.29  | 0.00252 | 0.27   | 0.00559 | -                                                                                                                                                                       |
| GlaUn024725 | 4.26  | 0.00354 | 2.25   | 0.03532 | -                                                                                                                                                                       |
| GlaUn024856 | 2.41  | 0.00659 | 0.05   | 3E-45   | -                                                                                                                                                                       |
| GlaUn024899 | 15.52 | 0.01183 | 3.9    | 0.00305 | PREDICTED: Elaeis guineensis U-box domain-containing protein 27-like (LOC105052049), mRNA<br>Triticum aestivum chromosome 3B, genomic scaffold, cultivar Chinese Spring |
| GlaUn024947 | 2.53  | 0.00337 | 2.69   | 0.00019 | -                                                                                                                                                                       |
| GlaUn025736 | 0.32  | 0.01942 | 0.28   | 0.0027  | -                                                                                                                                                                       |
| GlaUn027038 | 0.23  | 0.00142 | 0.2    | 0.01695 | Morus notabilis hypothetical protein partial mRNA                                                                                                                       |
| GlaUn027070 | 3.58  | 0.01037 | 2.66   | 0.00375 | -                                                                                                                                                                       |
| GlaUn027071 | 12.33 | 0.04095 | 18.61  | 5.4E-44 | PREDICTED: Phoenix dactylifera pyruvate decarboxylase 1 (LOC103695777), transcript variant X2, mRNA<br>Lycoris aurea mutant pyruvate decarboxylase mRNA, complete cds   |
| GlaUn027072 | 13.29 | 0.01546 | 21.19  | 4.7E-46 | -                                                                                                                                                                       |
| GlaUn027210 | 7.01  | 0.01096 | 2.58   | 0.03259 | -                                                                                                                                                                       |
| GlaUn027282 | 10.96 | 6.4E-05 | 0.23   | 0.00068 | -                                                                                                                                                                       |
| GlaUn027689 | 0.23  | 0.03268 | 0.02   | 0.002   | -                                                                                                                                                                       |
| GlaUn027797 | 43.67 | 0.00625 | 0.2    | 0.03951 | -                                                                                                                                                                       |
| GlaUn027966 | 7.56  | 0.01481 | 5.6    | 0.00021 | PREDICTED: Musa acuminata subsp. malaccensis protein UPSTREAM OF FLC-like (LOC103972317), mRNA                                                                          |
| GlaUn028013 | 2.69  | 0.00014 | 3.96   | 5.5E-06 | PREDICTED: Phoenix dactylifera histone H3.v1-like (LOC103717319), mRNA                                                                                                  |
| GlaUn028094 | 0.47  | 0.02615 | 6.36   | 1.5E-09 | PREDICTED: Elaeis guineensis bidirectional sugar transporter SWEET1a-like (LOC105037698), mRNA                                                                          |
| GlaUn028102 | 6.01  | 0.00367 | 0.44   | 0.03084 | PREDICTED: Elaeis guineensis probable calcium-binding protein CML10 (LOC105034665), mRNA                                                                                |
| GlaUn028256 | 2.97  | 6.9E-05 | 0.14   | 5.5E-13 | -                                                                                                                                                                       |
| GlaUn028482 | 8.05  | 0.00057 | 4.57   | 8.8E-13 | Oryza sativa Japonica Group DNA, chromosome 7, cultivar: Nipponbare, complete sequence                                                                                  |
| GlaUn028588 | 16.44 | 0.01415 | 4.47   | 1E-05   | Phleum pratense DNA, SSR, microsatellite B01-F10                                                                                                                        |
| GlaUn028763 | 0.4   | 0.00016 | 0.49   | 9.3E-06 | -                                                                                                                                                                       |
| GlaUn028945 | 0.36  | 0.01158 | 0.42   | 0.01599 | -                                                                                                                                                                       |
| GlaUn029234 | 5.11  | 0.03742 | 5.88   | 4.5E-11 | -                                                                                                                                                                       |
| GlaUn029417 | 29.82 | 7.9E-18 | 0.19   | 1.6E-10 | -                                                                                                                                                                       |
| GlaUn029521 | 0.19  | 0.01325 | 201.16 | 3.3E-33 | PREDICTED: Phoenix dactylifera uncharacterized LOC103715444 (LOC103715444), transcript variant X4, ncRNA                                                                |
| GlaUn029550 | 28.88 | 0.00048 | 0.17   | 0.0051  | -                                                                                                                                                                       |
| GlaUn029553 | 32.17 | 0.00023 | 0.16   | 0.00316 | -                                                                                                                                                                       |
| GlaUn030102 | 2.34  | 0.02792 | 3.49   | 5.6E-07 | -                                                                                                                                                                       |
| GlaUn030185 | 2     | 0.03302 | 0.19   | 3.6E-09 | PREDICTED: Elaeis guineensis indole-3-acetic acid-amido synthetase GH3.17-like (LOC105051115), mRNA                                                                     |
| GlaUn030352 | 0.34  | 6E-05   | 0.13   | 9.7E-07 | PREDICTED: Elaeis guineensis phosphatidylinositol/phosphatidylcholine transfer protein SFH8-like (LOC105045972), transcript variant X4, mRNA                            |
| GlaUn030354 | 0.27  | 5.8E-05 | 0.13   | 5.3E-06 | PREDICTED: Glycine max phosphatidylinositol/phosphatidylcholine transfer protein SFH8-                                                                                  |
| GlaUn030381 | 4.8   | 0.03277 | 3.72   | 0.01246 | -                                                                                                                                                                       |
| GlaUn030679 | 5.23  | 2.6E-16 | 2.74   | 3.5E-06 | PREDICTED: Elaeis guineensis probable protein phosphatase 2C 32 (LOC105057113), mRNA                                                                                    |
| GlaUn030761 | 3.63  | 0.04395 | 2.26   | 0.03366 | -                                                                                                                                                                       |
| GlaUn031536 | 2.46  | 0.04102 | 0.02   | 3.6E-45 | -                                                                                                                                                                       |
| GlaUn031554 | 32.83 | 0.00893 | 3.13   | 0.01754 | -                                                                                                                                                                       |
| GlaUn031555 | 33.83 | 0.00194 | 2.99   | 0.02603 | -                                                                                                                                                                       |
| GlaUn031867 | 2.56  | 0.0489  | 275.3  | 0.00099 | PREDICTED: Elaeis guineensis phosphoserine aminotransferase 2, chloroplastic-like (LOC105053256), mRNA                                                                  |
| GlaUn031891 | 0.45  | 0.00146 | 0.12   | 1E-27   | PREDICTED: Elaeis guineensis formin-A-like (LOC105056046), transcript variant X2, misc_RNA                                                                              |
| GlaUn031892 | 0.46  | 0.00286 | 0.12   | 3.9E-28 | PREDICTED: Elaeis guineensis formin-A-like (LOC105056046), transcript variant X2, misc_RNA                                                                              |
| GlaUn032100 | 3.24  | 0.03277 | 3.66   | 1.2E-07 | -                                                                                                                                                                       |

|             |       |         |        |         |                                                                                                                                                                                                                       |
|-------------|-------|---------|--------|---------|-----------------------------------------------------------------------------------------------------------------------------------------------------------------------------------------------------------------------|
| GlaUn032315 | 3.37  | 8.4E-07 | 0.07   | 8.6E-23 | -                                                                                                                                                                                                                     |
| GlaUn032319 | 0.38  | 0.02577 | 10.38  | 6.2E-31 | PREDICTED: Elaeis guineensis probable E3 ubiquitin-protein ligase XERICO (LOC105049948), mRNA                                                                                                                         |
| GlaUn032638 | 0.34  | 0.04787 | 0.1    | 0.00026 | -                                                                                                                                                                                                                     |
| GlaUn032640 | 0.36  | 0.04959 | 0.09   | 0.0003  | -                                                                                                                                                                                                                     |
| GlaUn032922 | 0.47  | 0.02741 | 0.43   | 0.0332  | PREDICTED: Elaeis guineensis thioredoxin-like 1-2, chloroplastic (LOC105057263), mRNA                                                                                                                                 |
| GlaUn033048 | 3.27  | 0.04706 | 0.02   | 2.1E-08 | -                                                                                                                                                                                                                     |
| GlaUn033049 | 2.89  | 0.01508 | 0.03   | 9.3E-12 | -                                                                                                                                                                                                                     |
| GlaUn033174 | 0.17  | 0.04901 | 239.07 | 5.8E-40 | PREDICTED: Phoenix dactylifera uncharacterized LOC103715444 (LOC103715444), transcript variant X4, ncRNA<br>PREDICTED: Musa acuminata subsp. malaccensis abscisic stress-ripening protein 2-like (LOC103971257), mRNA |
| GlaUn033264 | 0.37  | 0.00092 | 0.35   | 0.00999 | -                                                                                                                                                                                                                     |
| GlaUn033391 | 0.18  | 0.03207 | 0.23   | 0.03987 | -                                                                                                                                                                                                                     |
| GlaUn033631 | 0.37  | 0.01994 | 0.23   | 0.00968 | PREDICTED: Phoenix dactylifera RING-H2 finger protein ATL16-like (LOC103723035), mRNA<br>PREDICTED: Elaeis guineensis protein ASPARTIC PROTEASE                                                                       |
| GlaUn033736 | 10.15 | 1.2E-07 | 0.43   | 0.00375 | IN GUARD CELL 1-like (LOC105040986), mRNA<br>PREDICTED: Elaeis guineensis uncharacterized                                                                                                                             |
| GlaUn034087 | 7.63  | 0.02691 | 2.97   | 0.01422 | LOC105049936 (LOC105049936), mRNA                                                                                                                                                                                     |
| GlaUn034176 | 3.34  | 0.03842 | 3.21   | 1.1E-06 | -                                                                                                                                                                                                                     |
| GlaUn034177 | 3.6   | 0.00488 | 3.47   | 2.1E-08 | -                                                                                                                                                                                                                     |
| GlaUn034333 | 18.32 | 0.00198 | 0.19   | 0.00905 | -                                                                                                                                                                                                                     |
| GlaUn034334 | 19.1  | 0.00295 | 0.2    | 0.01336 | -                                                                                                                                                                                                                     |
| GlaUn034518 | 49.69 | 3.2E-05 | 0.33   | 0.02106 | PREDICTED: Elaeis guineensis putative lipoxygenase 5 (LOC105041807), mRNA<br>Vigna angularis var. angularis DNA, chromosome 2, almost complete sequence, cultivar: Shumari                                            |
| GlaUn034532 | 8.88  | 0.00259 | 5.58   | 0.00096 | -                                                                                                                                                                                                                     |
| GlaUn034787 | 0.31  | 0.04245 | 0.26   | 0.02789 | -                                                                                                                                                                                                                     |
| GlaUn035099 | 3.75  | 0.0425  | 2.4    | 3.3E-05 | PREDICTED: Elaeis guineensis uncharacterized LOC105053284 (LOC105053284), ncRNA<br>PREDICTED: Elaeis guineensis uncharacterized                                                                                       |
| GlaUn035100 | 4.17  | 0.04159 | 2.99   | 4.2E-08 | LOC105053291 (LOC105053291), mRNA<br>PREDICTED: Vitis vinifera ethylene-responsive transcription                                                                                                                      |
| GlaUn035225 | 4.61  | 0.00128 | 2.07   | 0.01473 | factor 2 (LOC100254640), mRNA<br>PREDICTED: Vitis vinifera ethylene-responsive transcription                                                                                                                          |
| GlaUn035226 | 4.65  | 0.00232 | 2.04   | 0.01716 | factor 2 (LOC100254640), mRNA                                                                                                                                                                                         |
| GlaUn035395 | 22.71 | 0.00567 | 0.27   | 0.04685 | -                                                                                                                                                                                                                     |
| GlaUn035701 | 0.11  | 0.03208 | 0.03   | 0.02818 | -                                                                                                                                                                                                                     |
| GlaUn035925 | 2.26  | 0.00887 | 2.06   | 0.01372 | PREDICTED: Elaeis guineensis uncharacterized LOC105054518 (LOC105054518), mRNA                                                                                                                                        |
| GlaUn035937 | 0.42  | 0.02477 | 0.28   | 0.00791 | -                                                                                                                                                                                                                     |
| GlaUn036000 | 2.26  | 0.01539 | 2.9    | 4.9E-05 | Panicum virgatum A14G29520-like protein mRNA, partial cds<br>PREDICTED: Elaeis guineensis uncharacterized                                                                                                             |
| GlaUn036001 | 2.24  | 0.00931 | 3.2    | 2.4E-06 | LOC105042827 (LOC105042827), mRNA<br>PREDICTED: Nelumbo nucifera inositol-tetrakisphosphate 1-                                                                                                                        |
| GlaUn036193 | 6.17  | 0.01432 | 3.05   | 0.00195 | kinase 1-like (LOC104609603), transcript variant X2, misc_RNA                                                                                                                                                         |
| GlaUn036437 | 5.16  | 0.01962 | 4.85   | 0.00872 | -                                                                                                                                                                                                                     |
| GlaUn036576 | 8.49  | 0.00613 | 2.67   | 0.01338 | -                                                                                                                                                                                                                     |
| GlaUn036698 | 23.19 | 3E-15   | 0.26   | 2.5E-07 | -                                                                                                                                                                                                                     |
| GlaUn036699 | 24.04 | 9.4E-15 | 0.27   | 8.1E-07 | -                                                                                                                                                                                                                     |
| GlaUn036747 | 13.11 | 0.00049 | 5.19   | 1.1E-05 | -                                                                                                                                                                                                                     |
| GlaUn036908 | 0.41  | 0.00069 | 0.26   | 3.8E-11 | PREDICTED: Musa acuminata subsp. malaccensis 21 kDa protein-like (LOC103975492), mRNA                                                                                                                                 |
| GlaUn037087 | 3.24  | 0.00089 | 0.14   | 6.3E-08 | Panicum virgatum clone E06_PVCAG-7 microsatellite sequence                                                                                                                                                            |
| GlaUn037242 | 6.88  | 0.04297 | 3.04   | 0.00609 | -                                                                                                                                                                                                                     |
| GlaUn037374 | 2.4   | 0.04731 | 2.34   | 0.00325 | PREDICTED: Phoenix dactylifera cytochrome b5 (LOC103722253), mRNA                                                                                                                                                     |
| GlaUn037379 | 3.26  | 0.0003  | 2.1    | 0.00083 | -                                                                                                                                                                                                                     |
| GlaUn037412 | 3.63  | 0.006   | 5.77   | 7.8E-13 | PREDICTED: Elaeis guineensis ethylene-responsive transcription factor ERF061-like (LOC105047575), mRNA                                                                                                                |
| GlaUn037694 | 5.31  | 1.7E-08 | 0.46   | 0.00082 | -                                                                                                                                                                                                                     |
| GlaUn037793 | 2.71  | 0.00728 | 3.5    | 0.02322 | -                                                                                                                                                                                                                     |
| GlaUn037794 | 2.56  | 0.00688 | 3.24   | 0.03891 | -                                                                                                                                                                                                                     |
| GlaUn037812 | 3.17  | 0.00122 | 0.06   | 4.9E-13 | -                                                                                                                                                                                                                     |
| GlaUn037820 | 6.43  | 9.3E-05 | 2.54   | 0.00356 | -                                                                                                                                                                                                                     |

|             |       |         |       |         |                                                                                                                                       |
|-------------|-------|---------|-------|---------|---------------------------------------------------------------------------------------------------------------------------------------|
| GlaUn037821 | 6.69  | 0.00026 | 2.51  | 0.00536 | -                                                                                                                                     |
| GlaUn037948 | 37.75 | 0.03694 | 24.48 | 2.3E-20 | PREDICTED: Phoenix dactylifera S-type anion channel SLAH1-like (LOC103703420), mRNA                                                   |
| GlaUn038261 | 0.29  | 0.00427 | 0.19  | 0.0253  | -                                                                                                                                     |
| GlaUn038331 | 52.33 | 0.03374 | 21.15 | 1.1E-21 | -                                                                                                                                     |
| GlaUn038442 | 0.35  | 0.01744 | 0.17  | 0.00679 | -                                                                                                                                     |
| GlaUn038832 | 8.09  | 0.01265 | 5.44  | 6.3E-05 | -                                                                                                                                     |
| GlaUn038892 | 2.4   | 0.00114 | 0.14  | 8.7E-14 | -                                                                                                                                     |
| GlaUn039104 | 46.42 | 7.4E-07 | 0.4   | 0.03263 | -                                                                                                                                     |
| GlaUn039470 | 2.09  | 0.03705 | 6.38  | 4.7E-06 | Gossypium nirsutum clone NBR1_GE00211 microsatellite                                                                                  |
| GlaUn039472 | 2.05  | 0.03287 | 6.22  | 1.7E-05 | Gossypium nirsutum clone NBR1_GE00211 microsatellite sequence                                                                         |
| GlaUn039536 | 24.32 | 0.00204 | 0.29  | 0.04095 | PREDICTED: Phoenix dactylifera phospholipase A1-1beta2, chloroplastic (LOC103713597), mRNA                                            |
| GlaUn039604 | 2.12  | 0.02858 | 0.13  | 3E-10   | -                                                                                                                                     |
| GlaUn039605 | 2.18  | 0.0256  | 0.13  | 4.9E-10 | -                                                                                                                                     |
| GlaUn039654 | 55.88 | 0.00634 | 3.83  | 0.00045 | -                                                                                                                                     |
| GlaUn039655 | 56.6  | 0.0202  | 3.77  | 0.00046 | -                                                                                                                                     |
| GlaUn039872 | 4.83  | 0.02427 | 2.54  | 0.01742 | PREDICTED: Musa acuminata subsp. malaccensis TGACG-sequence-specific DNA-binding protein TGA-1A-like (LOC103986471), mRNA             |
| GlaUn039918 | 0.31  | 0.00352 | 20.99 | 6.2E-37 | PREDICTED: Amborella trichopoda thaumatin-like protein 1b (LOC18441626), mRNA                                                         |
| GlaUn039919 | 0.38  | 0.02488 | 16.84 | 3E-33   | PREDICTED: Amborella trichopoda thaumatin-like protein 1b (LOC18441626), mRNA                                                         |
| GlaUn040335 | 122.2 | 1.1E-07 | 0.23  | 0.00059 | -                                                                                                                                     |
| GlaUn040336 | 115.8 | 6.1E-07 | 0.24  | 0.00152 | -                                                                                                                                     |
| GlaUn040350 | 11.3  | 0.00212 | 0.35  | 0.03374 | -                                                                                                                                     |
| GlaUn040380 | 25.54 | 5.3E-05 | 0.33  | 0.01773 | -                                                                                                                                     |
| GlaUn040537 | 4.47  | 0.01489 | 5.61  | 2.6E-09 | PREDICTED: Phoenix dactylifera 3-oxoacyl-[acyl-carrier-protein] reductase, chloroplastic-like (LOC103720253), mRNA                    |
| GlaUn040825 | 19.39 | 0.00481 | 0.26  | 0.03662 | PREDICTED: Elaeis guineensis serine acetyltransferase 1, chloroplastic (LOC105032793), mRNA                                           |
| GlaUn041014 | 2.92  | 0.01135 | 3.33  | 8.6E-05 | Toxicodendron radicans subsp. hispidum microsatellite DNA locus M56                                                                   |
| GlaUn041282 | 3.33  | 0.01943 | 3.58  | 0.00428 | PREDICTED: Musa acuminata subsp. malaccensis UPF0496 protein At3g19330 (LOC103990869), mRNA                                           |
| GlaUn041304 | 2.37  | 0.00038 | 2.4   | 0.04667 | -                                                                                                                                     |
| GlaUn041326 | 3.67  | 0.03157 | 3.32  | 8.5E-07 | -                                                                                                                                     |
| GlaUn041403 | 22.2  | 0.03752 | 2.63  | 0.00743 | -                                                                                                                                     |
| GlaUn041551 | 0.49  | 0.01387 | 0.33  | 0.00432 | PREDICTED: Phoenix dactylifera repressor of RNA polymerase III transcription MAF1 homolog (LOC103709694), transcript variant X2, mRNA |
| GlaUn041553 | 0.38  | 0.00056 | 0.12  | 0.00049 | -                                                                                                                                     |
| GlaUn041556 | 0.34  | 0.00172 | 0.16  | 0.00038 | PREDICTED: Phoenix dactylifera repressor of RNA polymerase III transcription MAF1 homolog (LOC103709694), transcript variant X1, mRNA |
| GlaUn041746 | 8.9   | 0.01806 | 2.24  | 0.04588 | -                                                                                                                                     |
| GlaUn041843 | 0.26  | 0.01268 | 24.69 | 9.7E-13 | PREDICTED: Eucalyptus grandis thaumatin-like protein 1 (LOC104422763), mRNA                                                           |
| GlaUn041873 | 0.21  | 0.01098 | 0.05  | 0.03717 | -                                                                                                                                     |
| GlaUn042115 | 11.05 | 0.04148 | 4.2   | 0.00608 | PREDICTED: Phoenix dactylifera U-box domain-containing protein 25-like (LOC103703189), mRNA                                           |
| GlaUn042179 | 3.59  | 0.00755 | 3.23  | 0.02434 | -                                                                                                                                     |
| GlaUn042181 | 3.57  | 0.00713 | 2.59  | 0.02519 | -                                                                                                                                     |
| GlaUn042182 | 3.91  | 0.00443 | 2.08  | 0.0478  | -                                                                                                                                     |
| GlaUn042246 | 7.3   | 6E-06   | 2.56  | 0.00036 | -                                                                                                                                     |
| GlaUn042557 | 8.4   | 0.00845 | 2.14  | 0.00613 | PREDICTED: Fragaria vesca subsp. vesca uncharacterized LOC101295283 (LOC101295283), ncRNA                                             |
| GlaUn042973 | 2.79  | 0.04749 | 3.26  | 1.6E-08 | PREDICTED: Elaeis guineensis protein YLS9-like (LOC105035820), mRNA                                                                   |
| GlaUn043327 | 21.05 | 4.7E-09 | 0.46  | 0.01418 | -                                                                                                                                     |
| GlaUn043353 | 0.3   | 0.01636 | 0.04  | 0.00066 | -                                                                                                                                     |
| GlaUn043417 | 2.85  | 0.00532 | 4.91  | 0.00081 | PREDICTED: Elaeis guineensis uncharacterized LOC105053895 (LOC105053895), mRNA                                                        |
| GlaUn043440 | 4.84  | 0.01868 | 2.51  | 0.029   | -                                                                                                                                     |

|             |       |         |       |         |                                                                                      |
|-------------|-------|---------|-------|---------|--------------------------------------------------------------------------------------|
| GlaUn043675 | 2.15  | 0.00051 | 0.16  | 4.3E-24 | PREDICTED: Phoenix dactylifera transcription factor PCF2-like (LOC103696613), mRNA   |
| GlaUn043804 | 0.32  | 0.03272 | 0.31  | 0.02408 | -                                                                                    |
| GlaUn044306 | 11.71 | 0.01687 | 2.75  | 8.5E-05 | Hyacinthus orientalis pollen-specific protein mRNA, partial cds                      |
| GlaUn044344 | 62.73 | 0.00049 | 0.26  | 0.04206 | -                                                                                    |
| GlaUn044354 | 2.33  | 0.00389 | 0.2   | 1.2E-07 | -                                                                                    |
| GlaUn044410 | 16.75 | 0.00017 | 0.31  | 0.01279 | -                                                                                    |
| GlaUn044567 | 0.37  | 0.03101 | 0.12  | 4E-06   | -                                                                                    |
| GlaUn044603 | 4.78  | 0.00053 | 5.02  | 8.8E-10 | PREDICTED: Elaeis guineensis auxin-induced protein X15-like (LOC105036306), mRNA     |
| GlaUn044604 | 6.05  | 2.8E-05 | 5.53  | 8.7E-12 | PREDICTED: Elaeis guineensis auxin-induced protein X15-like (LOC105036306), mRNA     |
| GlaUn044652 | 0.17  | 0.01211 | 13.27 | 4.2E-08 | PREDICTED: Phoenix dactylifera uncharacterized LOC103696034 (LOC103696034), mRNA     |
| GlaUn044653 | 0.22  | 0.03667 | 10.43 | 1.8E-10 | PREDICTED: Phoenix dactylifera uncharacterized LOC103696034 (LOC103696034), mRNA     |
| GlaUn044682 | 0.23  | 0.02047 | 0.21  | 0.03282 | -                                                                                    |
| GlaUn044782 | 31.08 | 0.00017 | 0.22  | 0.00779 | PREDICTED: Phoenix dactylifera uncharacterized LOC103722767 (LOC103722767), mRNA     |
| GlaUn044817 | 12.32 | 0.00505 | 3.12  | 0.00789 | -                                                                                    |
| GlaUn044893 | 5.09  | 2.1E-10 | 0.49  | 0.00075 | Anacymbium psammophilum microsatellite DNA locus AND11                               |
| GlaUn044907 | 3.07  | 0.00097 | 0.09  | 6.7E-12 | -                                                                                    |
| GlaUn044909 | 2.56  | 0.00189 | 0.1   | 3.7E-14 | -                                                                                    |
| GlaUn044941 | 0.46  | 0.03969 | 0.38  | 0.00369 | PREDICTED: Vitis vinifera uncharacterized LOC104881172 (LOC104881172), ncRNA         |
| GlaUn045097 | 0.34  | 0.0058  | 0.48  | 0.03655 | -                                                                                    |
| GlaUn045411 | 2.92  | 0.00014 | 6.7   | 6.5E-17 | -                                                                                    |
| GlaUn045583 | 0.3   | 0.00886 | 6.99  | 8.1E-11 | -                                                                                    |
| GlaUn045650 | 2.13  | 0.00015 | 0.13  | 2E-24   | -                                                                                    |
| GlaUn045652 | 2.2   | 5.3E-05 | 0.12  | 1.5E-27 | -                                                                                    |
| GlaUn045653 | 2.1   | 0.0105  | 0.22  | 2E-09   | -                                                                                    |
| GlaUn045826 | 46.95 | 5.9E-09 | 0.24  | 0.00032 | -                                                                                    |
| GlaUn045828 | 0.33  | 1.5E-05 | 0.16  | 0.0003  | -                                                                                    |
| GlaUn045968 | 6.29  | 3.2E-06 | 2.63  | 0.00339 | -                                                                                    |
| GlaUn045969 | 5.47  | 1.5E-06 | 2.24  | 0.01797 | -                                                                                    |
| GlaUn046209 | 2.04  | 0.00277 | 2.09  | 0.0038  | -                                                                                    |
| GlaUn046242 | 0.33  | 0.00294 | 0.13  | 0.00517 | -                                                                                    |
| GlaUn046532 | 0.47  | 0.00973 | 0.34  | 8.1E-08 | PREDICTED: Elaeis guineensis uncharacterized LOC105060016 (LOC105060016), mRNA       |
| GlaUn046533 | 0.45  | 0.0058  | 0.39  | 1.9E-06 | PREDICTED: Elaeis guineensis uncharacterized LOC105060016 (LOC105060016), mRNA       |
| GlaUn046534 | 0.45  | 0.00434 | 0.43  | 1.5E-05 | PREDICTED: Elaeis guineensis uncharacterized LOC105060016 (LOC105060016), mRNA       |
| GlaUn046806 | 0.27  | 0.04088 | 56.3  | 1.8E-18 | -                                                                                    |
| GlaUn046807 | 0.32  | 1.6E-06 | 37.3  | 2.1E-22 | Lilium longiflorum pollen caleosin mRNA, complete cds                                |
| GlaUn046808 | 0.45  | 0.00574 | 16.72 | 1.6E-15 | Lilium longiflorum pollen caleosin mRNA, complete cds                                |
| GlaUn046809 | 0.44  | 0.00405 | 16.24 | 2.7E-15 | Lilium longiflorum pollen caleosin mRNA, complete cds                                |
| GlaUn046824 | 0.1   | 0.00919 | 25.21 | 3.4E-10 | -                                                                                    |
| GlaUn046990 | 7.85  | 0.00017 | 3.37  | 0.00664 | PREDICTED: Elaeis guineensis uncharacterized LOC105033200 (LOC105033200), mRNA       |
| GlaUn047267 | 56.76 | 1.2E-11 | 0.34  | 0.00135 | -                                                                                    |
| GlaUn047640 | 0.49  | 0.00627 | 0.22  | 8.1E-19 | PREDICTED: Elaeis guineensis diacylglycerol O-acyltransferase 2 (LOC105052865), mRNA |
| GlaUn047641 | 0.47  | 0.00343 | 0.22  | 7.2E-19 | PREDICTED: Elaeis guineensis diacylglycerol O-acyltransferase 2 (LOC105052865), mRNA |
| GlaUn047708 | 0.36  | 0.01278 | 0.14  | 1.1E-05 | -                                                                                    |
| GlaUn048168 | 0.2   | 0.0058  | 0.2   | 0.03379 | -                                                                                    |
| GlaUn048186 | 6.83  | 0.01188 | 2.39  | 0.00069 | Phyllostachys edulis cDNA clone: bphyem107g20, full insert sequence                  |
| GlaUn048187 | 6.48  | 0.00598 | 2.31  | 0.00108 | Phyllostachys edulis cDNA clone: bphyem107g20, full insert sequence                  |
| GlaUn048416 | 0.34  | 0.00884 | 0.08  | 1E-12   | -                                                                                    |
| GlaUn048417 | 0.35  | 0.01008 | 0.08  | 3.9E-12 | -                                                                                    |
| GlaUn048459 | 7.44  | 3.2E-22 | 0.47  | 1.5E-05 | PREDICTED: Pyrus x bretschneideri F-box only protein 13-like (LOC103949665), mRNA    |

|             |       |         |        |         |                                                                                                                                  |
|-------------|-------|---------|--------|---------|----------------------------------------------------------------------------------------------------------------------------------|
|             |       |         |        |         | PREDICTED: Musa acuminata subsp. malaccensis pathogenesis-related genes transcriptional activator PTI5-like (LOC103989196), mRNA |
| GlaUn048491 | 13.78 | 0.00627 | 5.58   | 0.02594 |                                                                                                                                  |
| GlaUn048765 | 2.26  | 3.6E-05 | 0.19   | 1E-20   | -                                                                                                                                |
| GlaUn048824 | 6.37  | 3.4E-13 | 4.04   | 1.5E-10 | -                                                                                                                                |
| GlaUn049086 | 5.68  | 0.01063 | 0.41   | 0.03371 | Elaeis guineensis B11-like protein (LOC105046588), mRNA                                                                          |
| GlaUn049088 | 5.63  | 0.00424 | 0.41   | 0.02015 | PREDICTED: Phoenix dactylifera B11-like protein (LOC103704508), mRNA                                                             |
| GlaUn049122 | 7.53  | 1.2E-11 | 0.03   | 8.4E-26 | -                                                                                                                                |
| GlaUn049172 | 12.17 | 1.3E-15 | 0.02   | 2.8E-24 | -                                                                                                                                |
|             |       |         |        |         | Theobroma cacao SPFH/Band 7/PHB domain-containing membrane-associated protein family isoform 1 (TCM_018363) mRNA, complete cds   |
| GlaUn049848 | 0.43  | 0.02265 | 0.22   | 2.4E-06 | PREDICTED: Elaeis guineensis uncharacterized                                                                                     |
| GlaUn050050 | 0.39  | 2.3E-05 | 0.38   | 4.2E-09 | LOC105042973 (LOC105042973), transcript variant X3, mRNA                                                                         |
| GlaUn050051 | 0.38  | 0.00015 | 0.4    | 8.1E-06 | -                                                                                                                                |
|             |       |         |        |         | PREDICTED: Elaeis guineensis uncharacterized                                                                                     |
| GlaUn050052 | 0.38  | 1.7E-05 | 0.37   | 2.2E-09 | LOC105042973 (LOC105042973), transcript variant X3, mRNA                                                                         |
|             |       |         |        |         | PREDICTED: Elaeis guineensis uncharacterized                                                                                     |
| GlaUn050053 | 0.38  | 2E-05   | 0.37   | 1.9E-09 | LOC105042973 (LOC105042973), transcript variant X3, mRNA                                                                         |
|             |       |         |        |         | PREDICTED: Phoenix dactylifera uncharacterized                                                                                   |
| GlaUn050054 | 0.36  | 5E-06   | 0.36   | 2.1E-09 | LOC103721313 (LOC103721313), transcript variant X4, mRNA                                                                         |
| GlaUn050189 | 6.83  | 0.01187 | 3.35   | 0.00014 | -                                                                                                                                |
|             |       |         |        |         | PREDICTED: Phoenix dactylifera uncharacterized                                                                                   |
| GlaUn050202 | 5.86  | 0.00267 | 4      | 5.4E-12 | LOC103707423 (LOC103707423), mRNA                                                                                                |
| GlaUn050297 | 0.28  | 0.00155 | 17.84  | 1.8E-35 | -                                                                                                                                |
|             |       |         |        |         | PREDICTED: Musa acuminata subsp. malaccensis probable                                                                            |
| GlaUn050317 | 2.14  | 0.03916 | 2.6    | 0.0003  | WRKY transcription factor 71 (LOC103988756), mRNA                                                                                |
|             |       |         |        |         | PREDICTED: Phoenix dactylifera uncharacterized                                                                                   |
| GlaUn050611 | 0.48  | 0.04994 | 0.38   | 0.00015 | LOC103720866 (LOC103720866), mRNA                                                                                                |
|             |       |         |        |         | PREDICTED: Phoenix dactylifera auxin response factor 19-like (LOC103715543), mRNA                                                |
| GlaUn050652 | 2.76  | 9.7E-05 | 4.29   | 2.8E-12 |                                                                                                                                  |
|             |       |         |        |         | PREDICTED: Elaeis guineensis uncharacterized                                                                                     |
| GlaUn050861 | 2.66  | 0.00105 | 2.08   | 0.01243 | LOC105054706 (LOC105054706), mRNA                                                                                                |
|             |       |         |        |         | PREDICTED: Phoenix dactylifera mannan endo-1,4-beta-mannosidase 1-like (LOC103712710), mRNA                                      |
| GlaUn051298 | 0.17  | 0.04401 | 37.38  | 1.5E-10 |                                                                                                                                  |
| GlaUn051540 | 2.5   | 0.0137  | 0.15   | 7E-08   | -                                                                                                                                |
|             |       |         |        |         | PREDICTED: Populus euphratica protein REVEILLE 1-like (LOC105133175), transcript variant X2, mRNA                                |
| GlaUn051541 | 3.12  | 0.00032 | 0.15   | 8.6E-10 |                                                                                                                                  |
|             |       |         |        |         | PREDICTED: Populus euphratica protein REVEILLE 1-like (LOC105133175), transcript variant X2, mRNA                                |
| GlaUn051542 | 3.23  | 0.00015 | 0.15   | 2.6E-10 |                                                                                                                                  |
| GlaUn052029 | 59.48 | 1E-10   | 0.22   | 4.5E-05 | -                                                                                                                                |
|             |       |         |        |         | PREDICTED: Musa acuminata subsp. malaccensis dnaJ homolog subfamily B member 14 (LOC103989384), mRNA                             |
| GlaUn052055 | 30.83 | 0.01369 | 4.66   | 0.00012 |                                                                                                                                  |
| GlaUn052310 | 7.3   | 8.2E-05 | 26.44  | 7.8E-12 | -                                                                                                                                |
|             |       |         |        |         | Oryza sativa Japonica Group DNA, chromosome 10, cultivar: Nipponbare, complete sequence                                          |
| GlaUn052444 | 3.08  | 0.00776 | 3.72   | 2.5E-06 |                                                                                                                                  |
| GlaUn052487 | 0.32  | 0.00164 | 0.13   | 4.6E-06 | -                                                                                                                                |
| GlaUn052488 | 0.21  | 0.03773 | 0.06   | 0.04642 | -                                                                                                                                |
| GlaUn052538 | 2.23  | 0.04025 | 10.58  | 6.9E-06 | -                                                                                                                                |
| GlaUn052708 | 0.42  | 0.03366 | 0.23   | 3.1E-05 | -                                                                                                                                |
| GlaUn052869 | 4.05  | 3.9E-11 | 2.28   | 0.00045 | -                                                                                                                                |
| GlaUn052871 | 6.32  | 0.03508 | 5.25   | 4.3E-07 | -                                                                                                                                |
|             |       |         |        |         | PREDICTED: Phoenix dactylifera glycerophosphodiester phosphodiesterase gde1-like (LOC103708094), transcript variant X2, mRNA     |
| GlaUn052884 | 0.4   | 0.00353 | 0.12   | 3.9E-11 |                                                                                                                                  |
|             |       |         |        |         | Saccharum hybrid cultivar BAC clone ShCIR9020, selfed from cultivar R570                                                         |
| GlaUn053110 | 2.88  | 5.1E-05 | 3.82   | 0.03722 |                                                                                                                                  |
|             |       |         |        |         | Saccharum hybrid cultivar BAC clone ShCIR9020, selfed from cultivar R570                                                         |
| GlaUn053114 | 2.81  | 5.1E-05 | 3.82   | 0.03918 |                                                                                                                                  |
| GlaUn053115 | 2.43  | 0.00562 | 3.41   | 0.04332 | -                                                                                                                                |
|             |       |         |        |         | Saccharum hybrid cultivar BAC clone ShCIR9020, selfed from cultivar R570                                                         |
| GlaUn053118 | 2.88  | 6.6E-05 | 3.81   | 0.04094 |                                                                                                                                  |
|             |       |         |        |         | Saccharum hybrid cultivar BAC clone ShCIR9020, selfed from cultivar R570                                                         |
| GlaUn053120 | 2.16  | 0.03867 | 3.87   | 0.0175  |                                                                                                                                  |
| GlaUn053124 | 2.8   | 0.00404 | 3.95   | 0.04658 | -                                                                                                                                |
| GlaUn053387 | 0.37  | 0.03323 | 0.22   | 0.0008  | -                                                                                                                                |
| GlaUn053493 | 0.07  | 0.00035 | 224.77 | 3.1E-33 | -                                                                                                                                |

|             |       |         |       |         |                                                                                                                     |
|-------------|-------|---------|-------|---------|---------------------------------------------------------------------------------------------------------------------|
| GlaUn053498 | 12.33 | 0.04649 | 2.43  | 0.0332  | PREDICTED: Elaeis guineensis probable trehalose-phosphate phosphatase F (LOC105054029), transcript variant X4, mRNA |
| GlaUn054045 | 4.7   | 0.0073  | 4.66  | 2.5E-07 | -                                                                                                                   |
| GlaUn054072 | 0.44  | 0.03361 | 0.01  | 4.6E-13 | -                                                                                                                   |
| GlaUn054078 | 0.31  | 0.00887 | 0.01  | 9.2E-08 | -                                                                                                                   |
| GlaUn054140 | 0.37  | 0.04501 | 0.25  | 2.1E-05 | -                                                                                                                   |
| GlaUn054310 | 0.07  | 0.04901 | 275.3 | 2.5E-16 | -                                                                                                                   |
| GlaUn054372 | 3.5   | 0.02065 | 11.47 | 0.02904 | PREDICTED: Elaeis guineensis uncharacterized LOC105040143 (LOC105040143), transcript variant X2,                    |
| GlaUn054487 | 2.98  | 0.00822 | 0.06  | 3.8E-12 | -                                                                                                                   |
| GlaUn054509 | 0.42  | 0.0028  | 11.89 | 8.7E-06 | PREDICTED: Musa acuminata subsp. malaccensis naringenin,2-oxoglutarate 3-dioxygenase-like (LOC103993175),           |
| GlaUn054871 | 2.51  | 0.04634 | 3.42  | 4.5E-06 | PREDICTED: Elaeis guineensis bidirectional sugar transporter SWEET16-like (LOC105045177), mRNA                      |
| GlaUn054883 | 0.34  | 0.00153 | 0.21  | 0.0007  | -                                                                                                                   |
| GlaUn054996 | 0.41  | 0.03992 | 0.13  | 9.9E-05 | -                                                                                                                   |
| GlaUn055110 | 0.42  | 0.03906 | 0.42  | 0.00904 | -                                                                                                                   |
| GlaUn055219 | 2.02  | 0.00022 | 0.13  | 1.5E-26 | -                                                                                                                   |
| GlaUn055251 | 0.49  | 0.00736 | 0.07  | 3.1E-12 | PREDICTED: Citrus sinensis uncharacterized LOC107177752 (LOC107177752), mRNA                                        |
| GlaUn055252 | 0.27  | 6.1E-06 | 0.07  | 2E-10   | -                                                                                                                   |
| GlaUn055253 | 0.42  | 0.00028 | 0.08  | 3.7E-14 | -                                                                                                                   |
| GlaUn055492 | 4.08  | 0.04367 | 3.48  | 2.1E-06 | PREDICTED: Elaeis guineensis chorismate mutase 2-like (LOC105034692), mRNA                                          |
| GlaUn055881 | 28.9  | 1.7E-05 | 2.34  | 0.01881 | -                                                                                                                   |
| GlaUn056406 | 2.02  | 0.01438 | 2.66  | 0.00031 | PREDICTED: Elaeis guineensis scopoletin glucosyltransferase-like (LOC105047155), mRNA                               |
| GlaUn056436 | 0.24  | 0.00026 | 0.11  | 0.00648 | -                                                                                                                   |
| GlaUn056437 | 0.21  | 0.00208 | 0.09  | 0.01873 | -                                                                                                                   |
| GlaUn056478 | 0.37  | 0.00543 | 0.21  | 1.6E-05 | -                                                                                                                   |
| GlaUn056648 | 2.24  | 0.03745 | 0.14  | 1.3E-08 | -                                                                                                                   |
| GlaUn056894 | 0.31  | 0.00226 | 0.23  | 0.00066 | -                                                                                                                   |
| GlaUn056895 | 0.32  | 0.00408 | 0.24  | 0.00078 | -                                                                                                                   |
| GlaUn056977 | 2.18  | 0.02413 | 3.36  | 2.4E-06 | -                                                                                                                   |
| GlaUn057026 | 0.38  | 0.02006 | 0.31  | 0.0017  | PREDICTED: Phoenix dactylifera phototropin-2 (LOC103711883), mRNA                                                   |
| GlaUn057042 | 4.68  | 9.2E-12 | 2.9   | 0.03061 | Oryza sativa Japonica Group DNA, chromosome 3, cultivar: Nipponbare, complete sequence                              |
| GlaUn057189 | 0.08  | 0.00193 | 57.4  | 1.7E-22 | -                                                                                                                   |
| GlaUn057212 | 0.46  | 0.00366 | 0.26  | 3.1E-07 | Ornithogalum longibracteatum NAC domain-containing protein 29 isoform 1 (NAC-1) mRNA, complete cds                  |
| GlaUn057597 | 2.62  | 0.00521 | 4.56  | 5.4E-15 | PREDICTED: Phoenix dactylifera PRA1 family protein B4 (LOC103714372), mRNA                                          |
| GlaUn057790 | 0.43  | 0.03873 | 12.98 | 1.4E-29 | PREDICTED: Elaeis guineensis protein REVERSION-TO-ETHYLENE SENSITIVITY1 (LOC105059793), transcript variant          |
| GlaUn057826 | 0.29  | 0.03014 | 0.18  | 0.02341 | -                                                                                                                   |
| GlaUn057943 | 0.44  | 0.00589 | 0.1   | 5.5E-08 | -                                                                                                                   |
| GlaUn057944 | 0.45  | 0.00582 | 0.09  | 3.7E-10 | -                                                                                                                   |
| GlaUn057945 | 0.41  | 0.001   | 0.08  | 3.5E-08 | -                                                                                                                   |
| GlaUn058057 | 49.9  | 5E-13   | 0.31  | 0.00023 | -                                                                                                                   |
| GlaUn058058 | 37.15 | 1E-08   | 0.28  | 0.00097 | -                                                                                                                   |
| GlaUn058133 | 0.26  | 0.01708 | 0.1   | 0.0021  | -                                                                                                                   |
| GlaUn058348 | 0.45  | 0.03185 | 0.18  | 4.1E-08 | -                                                                                                                   |
| GlaUn058521 | 3.09  | 0.00717 | 3.53  | 1.5E-10 | PREDICTED: Musa acuminata subsp. malaccensis protein UPSTREAM OF FLC-like (LOC103972317), mRNA                      |
| GlaUn058522 | 3.27  | 0.02349 | 4.13  | 5.2E-13 | PREDICTED: Elaeis guineensis protein UPSTREAM OF FLC-like (LOC105056990), mRNA                                      |
| GlaUn058523 | 3.16  | 0.00852 | 3.58  | 9E-11   | PREDICTED: Elaeis guineensis protein UPSTREAM OF FLC-like (LOC105032834), transcript variant X2, mRNA               |
| GlaUn058524 | 3.18  | 0.00894 | 3.63  | 5.2E-11 | PREDICTED: Elaeis guineensis protein UPSTREAM OF FLC-like (LOC105056990), mRNA                                      |
| GlaUn058525 | 3.07  | 0.00767 | 3.53  | 1.5E-10 | PREDICTED: Musa acuminata subsp. malaccensis protein UPSTREAM OF FLC-like (LOC103972317), mRNA                      |
| GlaUn058587 | 3.59  | 0.0006  | 5.85  | 2.7E-10 | PREDICTED: Camelina sativa transcription factor DIVARICATA-like (LOC104764773), mRNA                                |



|             |        |         |       |         |                                                                                                                |
|-------------|--------|---------|-------|---------|----------------------------------------------------------------------------------------------------------------|
| GlaUn058593 | 3.74   | 0.0016  | 5.32  | 5E-12   | PREDICTED: Camelina sativa transcription factor DIVARICATA-like (LOC104764773), mRNA                           |
| GlaUn058755 | 2.1    | 0.00196 | 3.6   | 2.3E-10 | PREDICTED: Phoenix dactylifera double-stranded RNA-binding protein 2-like (LOC103713992), mRNA                 |
| GlaUn059241 | 2.45   | 0.01153 | 12.93 | 1.2E-09 | PREDICTED: Elaeis guineensis mitochondrial chaperone BCS1-like (LOC105047854), mRNA                            |
| GlaUn059242 | 4.09   | 1.5E-06 | 15.2  | 1.7E-09 | PREDICTED: Elaeis guineensis mitochondrial chaperone BCS1-like (LOC105047854), mRNA                            |
| GlaUn059243 | 3.03   | 0.00153 | 4.44  | 5.2E-05 | PREDICTED: Elaeis guineensis mitochondrial chaperone BCS1-like (LOC105047854), mRNA                            |
| GlaUn059266 | 2.82   | 0.01116 | 38.68 | 2.6E-24 | PREDICTED: Elaeis guineensis pectinesterase-like (LOC105053029), mRNA                                          |
| GlaUn059267 | 2.91   | 0.01439 | 39.39 | 2.1E-24 | PREDICTED: Elaeis guineensis pectinesterase-like (LOC105053029), mRNA                                          |
| GlaUn059297 | 2.46   | 0.04592 | 6.38  | 7.8E-15 | PREDICTED: Nelumbo nucifera ras-related protein RABA6b (LOC104609955), mRNA                                    |
| GlaUn059448 | 0.3    | 0.01237 | 0.22  | 0.00348 | -                                                                                                              |
| GlaUn059500 | 0.28   | 0.03404 | 0.04  | 2.1E-05 | -                                                                                                              |
| GlaUn059569 | 15.64  | 0.02452 | 3.02  | 0.00025 | PREDICTED: Elaeis guineensis brassinosteroid-regulated protein BRU1-like (LOC105049193), mRNA                  |
| GlaUn059570 | 13.74  | 0.03834 | 3.47  | 3.6E-06 | PREDICTED: Nelumbo nucifera probable xyloglucan endotransglucosylase/hydrolase protein 23 (LOC104586223), mRNA |
| GlaUn059606 | 2.47   | 0.03111 | 2.27  | 0.04506 | PREDICTED: Elaeis guineensis protein IQ-DOMAIN 1-like (LOC105044647), transcript variant X3, mRNA              |
| GlaUn059694 | 0.38   | 0.01846 | 0.15  | 0.01116 | -                                                                                                              |
| GlaUn059725 | 21.28  | 0.0044  | 0.15  | 0.00861 | -                                                                                                              |
| GlaUn059748 | 2.08   | 0.00156 | 0.2   | 1.8E-12 | PREDICTED: Phoenix dactylifera magnesium transporter MRS2-5-like (LOC103718206), transcript variant X2, mRNA   |
| GlaUn059752 | 2.15   | 0.00127 | 0.19  | 1.8E-11 | PREDICTED: Phoenix dactylifera magnesium transporter MRS2-5-like (LOC103718206), transcript variant X2, mRNA   |
| GlaUn060055 | 16.2   | 0.02726 | 4.31  | 0.0352  | -                                                                                                              |
| GlaUn060056 | 22.12  | 0.00413 | 3.07  | 0.02676 | -                                                                                                              |
| GlaUn060667 | 2      | 0.00449 | 4.41  | 1.7E-11 | PREDICTED: Phoenix dactylifera F-box/LRR-repeat protein 3 (LOC103719773), mRNA                                 |
| GlaUn060967 | 13.19  | 6.6E-05 | 0.32  | 0.00641 | PREDICTED: Phoenix dactylifera probable protein phosphatase 2C 4 (LOC103716499), mRNA                          |
| GlaUn061060 | 5.41   | 0.0134  | 3.6   | 3.9E-08 | Triticum aestivum TaABA8'OH1-D mRNA for ABA 8' hydroxylase, complete cds                                       |
| GlaUn061455 | 10.47  | 0.04754 | 0.21  | 0.0394  | -                                                                                                              |
| GlaUn061472 | 9.55   | 0.03238 | 3.33  | 0.00031 | Gladiolus hybrid cultivar allene oxide synthase (AOS) mRNA, complete cds                                       |
| GlaUn061683 | 11.41  | 1.8E-07 | 0.45  | 0.01133 | -                                                                                                              |
| GlaUn061690 | 15.82  | 1.3E-06 | 0.26  | 0.00035 | -                                                                                                              |
| GlaUn061771 | 12.01  | 0.00021 | 0.4   | 0.02886 | -                                                                                                              |
| GlaUn061797 | 0.33   | 0.02838 | 0.25  | 3.9E-05 | -                                                                                                              |
| GlaUn061843 | 7.22   | 0.00132 | 0.34  | 0.01068 | -                                                                                                              |
| GlaUn062139 | 0.19   | 9.2E-08 | 0.14  | 0.00028 | Medicago truncatula chromosome 5 clone mth2-124p21, COMPLETE SEQUENCE                                          |
| GlaUn062140 | 0.26   | 0.00123 | 0.33  | 0.03108 | Medicago truncatula chromosome 5 clone mth2-124p21, COMPLETE SEQUENCE                                          |
| GlaUn062578 | 0.48   | 0.00489 | 0.37  | 3.8E-05 | PREDICTED: Elaeis guineensis beta-amylase (LOC105052391), mRNA                                                 |
| GlaUn062629 | 39.3   | 0.00022 | 0.25  | 0.02082 | -                                                                                                              |
| GlaUn062888 | 13.04  | 0.00243 | 3.39  | 0.00074 | PREDICTED: Elaeis guineensis uncharacterized LOC105058510 (LOC105058510), mRNA                                 |
| GlaUn062995 | 0.28   | 0.0001  | 0.25  | 0.00016 | -                                                                                                              |
| GlaUn062997 | 3.37   | 0.00024 | 6.32  | 3.9E-10 | PREDICTED: Glycine max enoyl-CoA delta isomerase 1, peroxisomal (LOC100786464), mRNA                           |
| GlaUn063078 | 3.42   | 0.03574 | 3.46  | 0.00039 | -                                                                                                              |
| GlaUn063199 | 11.97  | 0.00753 | 3.58  | 0.02375 | PREDICTED: Elaeis guineensis elicitor-responsive protein 1 (LOC105052228), transcript variant X2, mRNA         |
| GlaUn063257 | 8.37   | 8.8E-07 | 2.83  | 9.3E-05 | -                                                                                                              |
| GlaUn063258 | 7.71   | 2.8E-05 | 2.81  | 0.00011 | -                                                                                                              |
| GlaUn063467 | 5.46   | 0.01182 | 6.91  | 4.1E-05 | PREDICTED: Elaeis guineensis uncharacterized LOC105044597 (LOC105044597), mRNA                                 |
| GlaUn063468 | 5.37   | 0.01182 | 6.82  | 5E-05   | PREDICTED: Elaeis guineensis uncharacterized LOC105044597 (LOC105044597), mRNA                                 |
| GlaUn063843 | 101.11 | 0.00024 | 0.19  | 0.00915 | -                                                                                                              |

|             |       |         |       |         |                                                                                                                                                                   |
|-------------|-------|---------|-------|---------|-------------------------------------------------------------------------------------------------------------------------------------------------------------------|
| GlaUn063958 | 0.29  | 0.00802 | 0.3   | 0.0257  | -                                                                                                                                                                 |
| GlaUn063991 | 0.28  | 5.6E-06 | 7.4   | 5.6E-11 | -                                                                                                                                                                 |
| GlaUn063992 | 0.27  | 2.9E-06 | 7.85  | 7.4E-11 | -                                                                                                                                                                 |
| GlaUn064033 | 8.59  | 1.7E-17 | 0.45  | 7.4E-05 | -                                                                                                                                                                 |
| GlaUn064034 | 7.22  | 5.7E-15 | 0.48  | 2.1E-05 | PREDICTED: <i>Elaeis guineensis</i> probable carboxylesterase 15 (LOC105034451), mRNA                                                                             |
| GlaUn064117 | 0.34  | 1E-05   | 0.04  | 1.2E-27 | -                                                                                                                                                                 |
| GlaUn064154 | 2.07  | 7.4E-05 | 0.16  | 1.9E-21 | -                                                                                                                                                                 |
| GlaUn064156 | 2.16  | 0.00024 | 0.16  | 1E-19   | -                                                                                                                                                                 |
| GlaUn064183 | 15.33 | 0.04968 | 5.8   | 1.3E-10 | PREDICTED: <i>Elaeis guineensis</i> myb-related protein Myb4-like (LOC105033428), mRNA                                                                            |
| GlaUn064303 | 0.45  | 0.00443 | 0.19  | 1.4E-07 | PREDICTED: <i>Elaeis guineensis</i> calcineurin B-like protein 3 (LOC105049942), transcript variant X4, mRNA                                                      |
| GlaUn064524 | 10.48 | 0.03673 | 5.02  | 9.1E-05 | PREDICTED: <i>Beta vulgaris</i> subsp. <i>vulgaris</i> probable WRKY transcription factor 40 (LOC104884530), mRNA                                                 |
| GlaUn064635 | 5.28  | 0.00027 | 2.59  | 0.00381 | -                                                                                                                                                                 |
| GlaUn064673 | 0.47  | 0.0256  | 0.17  | 3.5E-11 | PREDICTED: <i>Elaeis guineensis</i> uncharacterized LOC105045318 (LOC105045318), transcript variant X2, mRNA                                                      |
| GlaUn065097 | 22.71 | 0.04492 | 3.45  | 0.0121  | PREDICTED: <i>Musa acuminata</i> subsp. <i>malaccensis</i> leucine-rich repeat receptor-like serine/threonine/tyrosine-protein kinase SOBIR1 (LOC103996472), mRNA |
| GlaUn065166 | 0.37  | 0.0157  | 0.3   | 0.00227 | -                                                                                                                                                                 |
| GlaUn065175 | 6.16  | 0.00077 | 0.4   | 0.00669 | -                                                                                                                                                                 |
| GlaUn065190 | 0.24  | 0.00097 | 0.23  | 0.00104 | -                                                                                                                                                                 |
| GlaUn065236 | 2.26  | 0.00706 | 2.18  | 0.00198 | PREDICTED: <i>Tarenaya hassleriana</i> E3 ubiquitin-protein ligase ATL9-like (LOC104812700), mRNA                                                                 |
| GlaUn065480 | 0.38  | 0.00025 | 0.4   | 0.00046 | PREDICTED: <i>Musa acuminata</i> subsp. <i>malaccensis</i> zinc finger AN1 domain-containing stress-associated protein 15-like (LOC103979377), mRNA               |
| GlaUn065539 | 0.17  | 0.0013  | 0.04  | 0.0077  | -                                                                                                                                                                 |
| GlaUn065551 | 4.91  | 2.6E-09 | 0.47  | 0.00042 | -                                                                                                                                                                 |
| GlaUn065755 | 0.38  | 0.00949 | 31.07 | 5.8E-61 | PREDICTED: <i>Musa acuminata</i> subsp. <i>malaccensis</i> zinc finger protein 6-like (LOC103979231), mRNA                                                        |
| GlaUn065966 | 0.37  | 0.00024 | 0.29  | 3.6E-09 | PREDICTED: <i>Musa acuminata</i> subsp. <i>malaccensis</i> organic cation/carnitine transporter 2-like (LOC103978707), mRNA                                       |
| GlaUn066086 | 2.42  | 0.00548 | 2.44  | 0.00012 | PREDICTED: <i>Elaeis guineensis</i> uncharacterized LOC105059075 (LOC105059075), mRNA                                                                             |
| GlaUn067041 | 0.38  | 2.9E-05 | 5.71  | 1.2E-18 | PREDICTED: <i>Musa acuminata</i> subsp. <i>malaccensis</i> pectinesterase-like (LOC103982084), mRNA                                                               |
| GlaUn067433 | 0.08  | 9.2E-05 | 4.9   | 0.02351 | -                                                                                                                                                                 |
| GlaUn067434 | 0.07  | 2.2E-05 | 5.24  | 0.01801 | -                                                                                                                                                                 |
| GlaUn067688 | 8.89  | 6.2E-17 | 0.46  | 0.00015 | -                                                                                                                                                                 |
| GlaUn067862 | 12.55 | 4.9E-09 | 0.24  | 4E-06   | PREDICTED: <i>Phoenix dactylifera</i> uncharacterized LOC103696156 (LOC103696156), mRNA                                                                           |
| GlaUn067864 | 15.42 | 4.2E-08 | 0.3   | 0.00031 | PREDICTED: <i>Phoenix dactylifera</i> uncharacterized LOC103696156 (LOC103696156), mRNA                                                                           |
| GlaUn068335 | 2.41  | 0.00166 | 0.05  | 1E-57   | PREDICTED: <i>Elaeis guineensis</i> uncharacterized LOC105038671 (LOC105038671), transcript variant X1, mRNA                                                      |
| GlaUn068389 | 3.51  | 0.03593 | 3.85  | 3.4E-12 | >gi 743765268 ref XM_010914548.1  PREDICTED: <i>Elaeis guineensis</i> uncharacterized LOC105038671 (LOC105038671), transcript variant X2, mRNA                    |
| GlaUn068414 | 0.42  | 0.00245 | 0.13  | 6.7E-08 | PREDICTED: <i>Phoenix dactylifera</i> UDP-arabinopyranose mutase 1 (LOC103704494), mRNA                                                                           |
| GlaUn068927 | 7.47  | 0.00446 | 2.53  | 0.00156 | PREDICTED: <i>Eucalyptus grandis</i> transcription factor RAX2-like (LOC104436278), mRNA                                                                          |
| GlaUn068977 | 0.46  | 0.03895 | 0.41  | 0.00067 | <i>Freyinetia banksii</i> voucher S.W. Graham 02-03-14, UBC NADH-plastoquinone oxidoreductase subunit 7 (ndhH) gene, complete cds; plastid                        |
| GlaUn069063 | 10.15 | 5.1E-06 | 2.88  | 2.2E-05 | <i>Medicago truncatula</i> clone mth2-61k18, complete sequence                                                                                                    |
| GlaUn069064 | 10.13 | 1.7E-06 | 2.84  | 0.00028 | <i>Medicago truncatula</i> clone mth2-61k18, complete sequence                                                                                                    |
| GlaUn069065 | 10.26 | 2.9E-05 | 2.91  | 1.6E-05 | <i>Medicago truncatula</i> clone mth2-61k18, complete sequence                                                                                                    |
| GlaUn069129 | 8.35  | 6.4E-06 | 0.47  | 0.0225  | -                                                                                                                                                                 |
| GlaUn069174 | 0.35  | 0.00189 | 0.25  | 0.00031 | -                                                                                                                                                                 |
| GlaUn069369 | 3.79  | 3.8E-11 | 2.39  | 6.2E-05 | PREDICTED: <i>Musa acuminata</i> subsp. <i>malaccensis</i> glutamate decarboxylase 4-like (LOC103995822), mRNA                                                    |
| GlaUn069654 | 2.03  | 0.0026  | 3.78  | 1E-08   | <i>Oryza sativa Japonica Group</i> DNA, chromosome 2, cultivar: Nipponbare, complete sequence                                                                     |

|             |       |         |       |         |                                                                                                                                                                         |
|-------------|-------|---------|-------|---------|-------------------------------------------------------------------------------------------------------------------------------------------------------------------------|
| GlaUn069670 | 6.25  | 0.00378 | 0.42  | 0.02484 | -                                                                                                                                                                       |
| GlaUn069795 | 0.42  | 0.04726 | 0.42  | 0.00964 | -                                                                                                                                                                       |
| GlaUn069978 | 2.36  | 0.00125 | 0.14  | 4.3E-14 | -                                                                                                                                                                       |
| GlaUn069984 | 2.46  | 0.01093 | 0.12  | 3.8E-08 | -                                                                                                                                                                       |
| GlaUn069999 | 9.76  | 0.02426 | 3.53  | 0.00457 | Oryza sativa Japonica Group DNA, chromosome 2, cultivar: Nipponbare, complete sequence                                                                                  |
| GlaUn070057 | 5.28  | 8.4E-08 | 11.12 | 0.02287 | PREDICTED: Nicotiana sylvestris uncharacterized LOC104217556 (LOC104217556), mRNA                                                                                       |
| GlaUn070058 | 4.71  | 5.3E-07 | 10.83 | 0.02397 | PREDICTED: Nicotiana sylvestris uncharacterized LOC104217556 (LOC104217556), mRNA                                                                                       |
| GlaUn070059 | 4.23  | 1.9E-11 | 10.33 | 0.01619 | PREDICTED: Nicotiana sylvestris uncharacterized LOC104217556 (LOC104217556), mRNA                                                                                       |
| GlaUn070060 | 4.7   | 6E-07   | 10.71 | 0.0244  | PREDICTED: Nicotiana sylvestris uncharacterized LOC104217556 (LOC104217556), mRNA                                                                                       |
| GlaUn070061 | 4.08  | 3.6E-11 | 10.19 | 0.01866 | PREDICTED: Nicotiana sylvestris uncharacterized LOC104217556 (LOC104217556), mRNA                                                                                       |
| GlaUn070201 | 2.78  | 0.02067 | 3.85  | 0.00092 | Gladiolus grandiflorus SAM synthetase 1 (SAM1) mRNA, complete cds                                                                                                       |
| GlaUn070484 | 6.35  | 0.00471 | 5.85  | 7.7E-05 | -                                                                                                                                                                       |
| GlaUn070525 | 0.36  | 4.2E-06 | 0.29  | 1.4E-06 | PREDICTED: Phoenix dactylifera serine/threonine-protein kinase HT1-like (LOC103701974), transcript variant X2, mRNA                                                     |
| GlaUn070781 | 4.04  | 0.00352 | 13.69 | 2.9E-20 | Aloe arborescens type III polyketide synthase (PKS5) mRNA, complete cds                                                                                                 |
| GlaUn070783 | 3.36  | 0.04436 | 14.23 | 3.4E-15 | Aloe arborescens type III polyketide synthase (PKS5) mRNA, complete cds                                                                                                 |
| GlaUn070785 | 4.04  | 0.0002  | 10.02 | 7.7E-14 | Aloe arborescens type III polyketide synthase (PKS5) mRNA, complete cds                                                                                                 |
| GlaUn071399 | 2.5   | 0.02332 | 2.92  | 2.6E-06 | PREDICTED: Elaeis guineensis RNA polymerase sigma factor sigE, chloroplastic/mitochondrial (LOC105039465), transcript variant X2, mRNA >gij743755896 ref XM_010915640.1 |
| GlaUn071508 | 4.51  | 9.2E-12 | 16.12 | 8.5E-11 | PREDICTED: Elaeis guineensis RNA polymerase sigma factor sigE, chloroplastic/mitochondrial (LOC105039465), transcript variant X3, mRNA                                  |
| GlaUn072285 | 2.67  | 0.02057 | 4.43  | 1.4E-08 | PREDICTED: Phoenix dactylifera UDP-glycosyltransferase 85A2-like (LOC103717956), mRNA                                                                                   |
| GlaUn072515 | 4.27  | 0.04517 | 4.01  | 9.5E-09 | PREDICTED: Musa acuminata subsp. malaccensis G-type lectin S-receptor-like serine/threonine-protein kinase At5g35370 (LOC103975526), mRNA                               |
| GlaUn072936 | 2.76  | 0.01689 | 3.04  | 0.00013 | PREDICTED: Phoenix dactylifera short-chain dehydrogenase reductase 3b-like (LOC103723725), mRNA                                                                         |
| GlaUn073098 | 0.33  | 0.01645 | 0.16  | 0.00976 | PREDICTED: Elaeis guineensis fructose-1,6-bisphosphatase, cytosolic (LOC105049443), mRNA                                                                                |
| GlaUn073099 | 0.41  | 0.04687 | 0.14  | 2.6E-08 | -                                                                                                                                                                       |
| GlaUn073103 | 0.42  | 0.02967 | 0.15  | 4.9E-08 | -                                                                                                                                                                       |
| GlaUn073126 | 0.48  | 0.02943 | 0.25  | 4.1E-06 | PREDICTED: Phoenix dactylifera serine/arginine-rich-splicing factor SR34-like (LOC103707242), transcript variant X5, misc_RNA                                           |
| GlaUn073181 | 3.45  | 0.00057 | 2.53  | 0.00193 | -                                                                                                                                                                       |
| GlaUn073325 | 10.92 | 0.00133 | 0.4   | 0.04006 | PREDICTED: Elaeis guineensis protein EXORDIUM-like (LOC105056796), mRNA                                                                                                 |
| GlaUn073401 | 2.29  | 0.00042 | 15.36 | 6.4E-24 | Morus notabilis Putative methyltransferase partial mRNA                                                                                                                 |
| GlaUn073498 | 10.76 | 8.3E-17 | 0.39  | 1.8E-05 | -                                                                                                                                                                       |
| GlaUn073499 | 11.82 | 9.5E-17 | 0.36  | 8.3E-06 | -                                                                                                                                                                       |
| GlaUn073536 | 0.4   | 0.00548 | 0.09  | 3.4E-13 | -                                                                                                                                                                       |
| GlaUn073711 | 15.74 | 2.3E-19 | 0.2   | 1.5E-12 | -                                                                                                                                                                       |
| GlaUn073712 | 17.38 | 5.7E-27 | 0.17  | 1E-15   | -                                                                                                                                                                       |
| GlaUn073876 | 2.29  | 0.03655 | 4.62  | 0.0006  | PREDICTED: Brachypodium distachyon uncharacterized acetyltransferase At3g50280-like (LOC100843759), mRNA                                                                |
| GlaUn073878 | 2.35  | 0.03052 | 4.5   | 0.00054 | PREDICTED: Brachypodium distachyon uncharacterized acetyltransferase At3g50280-like (LOC100843759), mRNA                                                                |
| GlaUn074018 | 3.77  | 0.03821 | 6.59  | 4.7E-22 | -                                                                                                                                                                       |
| GlaUn074019 | 9.17  | 0.00352 | 5.84  | 3.4E-13 | -                                                                                                                                                                       |
| GlaUn074023 | 2.87  | 0.01864 | 2.78  | 7.8E-07 | PREDICTED: Phoenix dactylifera mitogen-activated protein kinase kinase 5 (LOC103718404), mRNA                                                                           |
| GlaUn074024 | 2.51  | 0.04478 | 3.07  | 3.1E-08 | PREDICTED: Phoenix dactylifera mitogen-activated protein kinase kinase 5 (LOC103718404), mRNA                                                                           |
| GlaUn074027 | 2.25  | 0.03315 | 3.69  | 6E-11   | PREDICTED: Phoenix dactylifera mitogen-activated protein kinase kinase 5 (LOC103718404), mRNA                                                                           |

|             |       |         |         |         |                                                                                                                                                                                    |
|-------------|-------|---------|---------|---------|------------------------------------------------------------------------------------------------------------------------------------------------------------------------------------|
| GlaUn074358 | 2.52  | 0.02809 | 2.74    | 0.02228 | -                                                                                                                                                                                  |
| GlaUn074359 | 2.53  | 0.02809 | 2.61    | 0.0332  | -                                                                                                                                                                                  |
| GlaUn074525 | 0.33  | 0.00644 | 0.15    | 5.9E-09 | -                                                                                                                                                                                  |
| GlaUn074712 | 2.34  | 6.1E-05 | 0.16    | 1.7E-18 | -                                                                                                                                                                                  |
| GlaUn074829 | 2.66  | 0.00989 | 3.54    | 1E-10   | Narcissus pseudonarcissus S-adenosylmethionine decarboxylase (SAMdc) mRNA, complete cds<br>Narcissus pseudonarcissus S-adenosylmethionine decarboxylase (SAMdc) mRNA, complete cds |
| GlaUn074832 | 2.6   | 0.01827 | 3.14    | 1.1E-08 | decarboxylase (SAMdc) mRNA, complete cds                                                                                                                                           |
| GlaUn075216 | 2.29  | 0.03447 | 0.15    | 5.5E-08 | -                                                                                                                                                                                  |
| GlaUn075362 | 3.43  | 1.3E-06 | 0.13    | 9.3E-16 | -                                                                                                                                                                                  |
| GlaUn076110 | 3.44  | 0.00408 | 2.14    | 0.01003 | PREDICTED: Musa acuminata subsp. malaccensis probable 2-aminoethanethiol dioxygenase (LOC103995095), mRNA                                                                          |
| GlaUn076216 | 0.43  | 0.01625 | 0.35    | 0.00217 | -                                                                                                                                                                                  |
| GlaUn076317 | 14.65 | 4.1E-05 | 0.34    | 0.00951 | PREDICTED: Nicotiana glauca formin-like protein 4 (LOC104244000), mRNA                                                                                                             |
| GlaUn076318 | 15.33 | 1.5E-05 | 0.34    | 0.00683 | PREDICTED: Nicotiana glauca formin-like protein 4 (LOC104244000), mRNA                                                                                                             |
| GlaUn076824 | 4.22  | 0.00014 | 3.16    | 6.3E-09 | PREDICTED: Phoenix dactylifera 4-alpha-glucanotransferase DPE1, chloroplastic/amyloplastic (LOC103721718), mRNA                                                                    |
| GlaUn076835 | 5.27  | 0.04242 | 49.07   | 2.1E-19 | PREDICTED: Phoenix dactylifera trans-resveratrol di-O-methyltransferase-like (LOC103706155), mRNA                                                                                  |
| GlaUn076993 | 3.38  | 0.00205 | 6.81    | 5.8E-16 | PREDICTED: Phoenix dactylifera pentatricopeptide repeat-containing protein At5g66520-like (LOC103717324), mRNA                                                                     |
| GlaUn077347 | 2.03  | 0.03747 | 0.22    | 9.2E-08 | -                                                                                                                                                                                  |
| GlaUn077349 | 2.51  | 2.8E-06 | 0.13    | 8E-25   | -                                                                                                                                                                                  |
| GlaUn077350 | 2.53  | 2.4E-06 | 0.13    | 2.7E-25 | -                                                                                                                                                                                  |
| GlaUn077352 | 2.14  | 0.00879 | 0.18    | 6.4E-11 | -                                                                                                                                                                                  |
| GlaUn077353 | 2.5   | 3.2E-06 | 0.13    | 1.9E-25 | -                                                                                                                                                                                  |
| GlaUn077354 | 2.17  | 0.00057 | 0.19    | 2.4E-15 | -                                                                                                                                                                                  |
| GlaUn077524 | 3.78  | 0.01363 | 3.13    | 1.8E-07 | PREDICTED: Phoenix dactylifera anamorsin homolog (LOC103717059), transcript variant X2, mRNA                                                                                       |
| GlaUn077525 | 3.37  | 0.02043 | 3.96    | 3.7E-11 | PREDICTED: Phoenix dactylifera anamorsin homolog (LOC103717059), transcript variant X2, mRNA                                                                                       |
| GlaUn077526 | 3.26  | 0.00035 | 3.57    | 1.7E-09 | -                                                                                                                                                                                  |
| GlaUn078100 | 0.45  | 0.02344 | 8.68    | 9.8E-24 | -                                                                                                                                                                                  |
| GlaUn078254 | 0.07  | 0.00161 | 1267.27 | 1.1E-82 | PREDICTED: Elaeis guineensis uncharacterized acetyltransferase At3g50280 (LOC105046267), mRNA                                                                                      |
| GlaUn078691 | 11.94 | 0.00611 | 0.2     | 0.00872 | PREDICTED: Elaeis guineensis chitin-inducible gibberellin-responsive protein 1-like (LOC105046940), mRNA                                                                           |
| GlaUn078692 | 12.08 | 0.00503 | 0.19    | 0.00704 | PREDICTED: Elaeis guineensis chitin-inducible gibberellin-responsive protein 1-like (LOC105046940), mRNA                                                                           |
| GlaUn078734 | 2.07  | 0.0157  | 2.18    | 0.00036 | Ananas bracteatus clone 50906d microsatellite sequence                                                                                                                             |
| GlaUn078735 | 2.05  | 0.01937 | 2.22    | 0.00025 | Ananas bracteatus clone 50906d microsatellite sequence                                                                                                                             |
| GlaUn078852 | 2.01  | 0.02907 | 4.18    | 4.7E-13 | Gladiolus hybrid cultivar protein phosphatase 2C (PP2C1) mRNA, complete cds                                                                                                        |
| GlaUn079002 | 0.35  | 0.02263 | 0.13    | 0.00033 | -                                                                                                                                                                                  |
| GlaUn079233 | 2.06  | 0.00015 | 0.18    | 8.7E-20 | -                                                                                                                                                                                  |
| GlaUn079235 | 2.45  | 8.4E-07 | 0.19    | 1.3E-20 | -                                                                                                                                                                                  |
| GlaUn079337 | 3.42  | 0.00022 | 0.07    | 4.2E-15 | Cucumis melo genomic chromosome, chr_9                                                                                                                                             |
| GlaUn079971 | 4.38  | 0.0018  | 2.3     | 8.9E-05 | PREDICTED: Elaeis guineensis UDP-glucose 6-dehydrogenase 5-like (LOC105058153), mRNA                                                                                               |
| GlaUn079972 | 4.04  | 0.00366 | 2.27    | 0.00014 | PREDICTED: Zea mays LOC100282847 (gpm540b), transcript variant X1, mRNA                                                                                                            |
| GlaUn079979 | 10.67 | 3E-15   | 3.95    | 4.2E-07 | PREDICTED: Phoenix dactylifera G-type lectin S-receptor-like serine/threonine-protein kinase SD2-5 (LOC103705662), mRNA                                                            |
| GlaUn080047 | 4.31  | 9.8E-18 | 0.11    | 5.8E-36 | PREDICTED: Malus x domestica transcription factor bHLH63 (LOC103440396), transcript variant X2, mRNA                                                                               |
| GlaUn080048 | 3.4   | 4.6E-12 | 0.14    | 9.4E-28 | PREDICTED: Malus x domestica transcription factor bHLH63 (LOC103440396), transcript variant X2, mRNA                                                                               |
| GlaUn080049 | 4.03  | 2.6E-16 | 0.11    | 5.7E-35 | PREDICTED: Malus x domestica transcription factor bHLH63 (LOC103440396), transcript variant X2, mRNA                                                                               |
| GlaUn080050 | 4.03  | 2.6E-16 | 0.11    | 5.9E-35 | PREDICTED: Malus x domestica transcription factor bHLH63 (LOC103440396), transcript variant X2, mRNA                                                                               |
| GlaUn080051 | 4.45  | 1.7E-18 | 0.11    | 1.5E-36 | PREDICTED: Malus x domestica transcription factor bHLH63 (LOC103440396), transcript variant X2, mRNA                                                                               |
| GlaUn080052 | 3.6   | 8.1E-12 | 0.11    | 4.9E-29 | PREDICTED: Prunus mume transcription factor bHLH63 (LOC103335662), mRNA                                                                                                            |

|             |       |         |       |         |                                                                                                                                     |
|-------------|-------|---------|-------|---------|-------------------------------------------------------------------------------------------------------------------------------------|
| GlaUn080053 | 4.26  | 1.6E-17 | 0.11  | 2.5E-36 | PREDICTED: Malus x domestica transcription factor bHLH63 (LOC103440396), transcript variant X2, mRNA                                |
| GlaUn080055 | 4.62  | 8.2E-19 | 0.11  | 4.2E-36 | PREDICTED: Prunus mume transcription factor bHLH63 (LOC103335662), mRNA                                                             |
| GlaUn080056 | 3.41  | 4.2E-12 | 0.14  | 8.7E-28 | PREDICTED: Malus x domestica transcription factor bHLH63 (LOC103440396), transcript variant X2, mRNA                                |
| GlaUn080057 | 3.5   | 3.6E-13 | 0.12  | 5.3E-33 | PREDICTED: Malus x domestica transcription factor bHLH63 (LOC103440396), transcript variant X2, mRNA                                |
| GlaUn080058 | 4.13  | 7.7E-17 | 0.11  | 3.4E-35 | PREDICTED: Malus x domestica transcription factor bHLH63 (LOC103440396), transcript variant X2, mRNA                                |
| GlaUn080128 | 2.09  | 0.00045 | 0.17  | 1.5E-18 | -                                                                                                                                   |
| GlaUn080129 | 2.03  | 0.00071 | 0.17  | 3.3E-19 | -                                                                                                                                   |
| GlaUn080849 | 12.58 | 0.01067 | 3.95  | 4.2E-09 | PREDICTED: Brachypodium distachyon protein DETOXIFICATION 49-like (LOC100822136), mRNA                                              |
| GlaUn080910 | 0.38  | 0.02707 | 0.49  | 0.04843 | -                                                                                                                                   |
| GlaUn080954 | 9.05  | 0.00063 | 0.39  | 0.02981 | -                                                                                                                                   |
| GlaUn080959 | 24.22 | 0.00251 | 0.19  | 0.0145  | -                                                                                                                                   |
| GlaUn081137 | 12.21 | 0.00097 | 5.61  | 6.7E-10 | PREDICTED: Phoenix dactylifera omega-3 fatty acid desaturase, chloroplastic (LOC103709505), mRNA                                    |
| GlaUn081138 | 11.84 | 0.00125 | 5.36  | 1.5E-09 | PREDICTED: Phoenix dactylifera omega-3 fatty acid desaturase, chloroplastic (LOC103709505), mRNA                                    |
| GlaUn081217 | 4     | 0.00668 | 2.63  | 0.00127 | PREDICTED: Phoenix dactylifera cleavage stimulation factor subunit 2-like (LOC103703217), transcript variant X3, mRNA               |
| GlaUn081270 | 4.5   | 0.00233 | 0.07  | 1.7E-08 | -                                                                                                                                   |
| GlaUn081393 | 3.06  | 0.01262 | 3.81  | 0.00592 | -                                                                                                                                   |
| GlaUn081532 | 3.36  | 0.04932 | 2.59  | 1.3E-05 | PREDICTED: Nelumbo nucifera uncharacterized serine-rich protein C215.13 (LOC104598892), mRNA                                        |
| GlaUn081611 | 6.1   | 0.00443 | 2.73  | 0.00164 | PREDICTED: Elaeis guineensis probable receptor-like protein kinase At1g67000 (LOC105036386), partial mRNA                           |
| GlaUn081698 | 2.21  | 2.5E-05 | 0.11  | 1.5E-30 | PREDICTED: Elaeis guineensis probable protein phosphatase 2C 75 (LOC105043050), transcript variant X2, mRNA                         |
| GlaUn081699 | 2.15  | 4.8E-05 | 0.11  | 1.1E-30 | PREDICTED: Elaeis guineensis probable protein phosphatase 2C 75 (LOC105043050), transcript variant X2, mRNA                         |
| GlaUn081700 | 2.13  | 6.1E-05 | 0.11  | 5.4E-30 | PREDICTED: Elaeis guineensis probable protein phosphatase 2C 75 (LOC105043050), transcript variant X2, mRNA                         |
| GlaUn081701 | 2.16  | 3.7E-05 | 0.11  | 1.8E-30 | PREDICTED: Elaeis guineensis probable protein phosphatase 2C 75 (LOC105043050), transcript variant X2, mRNA                         |
| GlaUn081702 | 2.16  | 0.00131 | 0.13  | 2.4E-17 | PREDICTED: Elaeis guineensis probable protein phosphatase 2C 75 (LOC105053585), transcript variant X6, mRNA                         |
| GlaUn081703 | 2.43  | 1.7E-05 | 0.19  | 2.2E-16 | PREDICTED: Elaeis guineensis probable protein phosphatase 2C 75 (LOC105053585), transcript variant X4, mRNA                         |
| GlaUn081845 | 0.3   | 0.00076 | 0.08  | 7E-07   | -                                                                                                                                   |
| GlaUn082334 | 30.79 | 0.00011 | 0.19  | 0.00514 | -                                                                                                                                   |
| GlaUn082335 | 30.71 | 2.8E-05 | 0.19  | 0.0024  | -                                                                                                                                   |
| GlaUn082426 | 7.03  | 0.00427 | 4.99  | 6.2E-05 | -                                                                                                                                   |
| GlaUn082717 | 2.58  | 0.00408 | 0.08  | 8.2E-16 | PREDICTED: Musa acuminata subsp. malaccensis uncharacterized LOC103974645 (LOC103974645), mRNA                                      |
| GlaUn082747 | 0.47  | 0.03268 | 0.45  | 0.00083 | PREDICTED: Elaeis guineensis probable tetraacyldisaccharide 4'-kinase, mitochondrial (LOC105046825), transcript variant X3, mRNA    |
| GlaUn082748 | 0.44  | 0.023   | 0.44  | 0.00883 | -                                                                                                                                   |
| GlaUn082899 | 2.34  | 0.00038 | 0.09  | 4.7E-21 | -                                                                                                                                   |
| GlaUn083070 | 0.23  | 0.00121 | 13.99 | 1.1E-24 | -                                                                                                                                   |
| GlaUn083600 | 6.82  | 0.00727 | 13.48 | 4.7E-19 | PREDICTED: Eucalyptus grandis uncharacterized LOC104428535 (LOC104428535), mRNA                                                     |
| GlaUn083633 | 0.09  | 0.02227 | 69.14 | 1.2E-19 | Sandersonia aurantiaca papain-like cysteine protease (PRT5) mRNA, complete cds                                                      |
| GlaUn083802 | 39.81 | 0.01584 | 0.12  | 0.03067 | -                                                                                                                                   |
| GlaUn084355 | 4.07  | 0.00405 | 11.29 | 0.00165 | PREDICTED: Elaeis guineensis mitochondrial chaperone BCS1-like (LOC105056311), mRNA                                                 |
| GlaUn084356 | 3.91  | 0.00621 | 11.77 | 0.00177 | PREDICTED: Elaeis guineensis mitochondrial chaperone BCS1-like (LOC105056311), mRNA                                                 |
| GlaUn084412 | 4.07  | 0.00043 | 4.21  | 2.5E-08 | PREDICTED: Phoenix dactylifera 1-aminocyclopropane-1-carboxylate oxidase homolog 3-like (LOC103717337), transcript variant X4, mRNA |
| GlaUn084483 | 0.34  | 0.00027 | 0.15  | 1.5E-08 | -                                                                                                                                   |
| GlaUn084701 | 0.31  | 0.00389 | 0.21  | 0.00079 | -                                                                                                                                   |
| GlaUn084702 | 0.3   | 0.007   | 0.18  | 0.00109 | -                                                                                                                                   |

|             |       |         |       |         |                                                                                                                                                  |
|-------------|-------|---------|-------|---------|--------------------------------------------------------------------------------------------------------------------------------------------------|
| GlaUn084750 | 0.39  | 0.02598 | 0.47  | 0.03646 | PREDICTED: Solanum lycopersicum E3 ubiquitin ligase BIG BROTHER-like (LOC101266907), transcript variant X4, mRNA                                 |
| GlaUn084967 | 12.59 | 5.2E-05 | 0.27  | 0.00227 | -                                                                                                                                                |
| GlaUn085006 | 6.39  | 0.00706 | 8.01  | 0.02245 | PREDICTED: Elaeis guineensis putative receptor protein kinase ZmPK1 (LOC105050315), mRNA                                                         |
| GlaUn085008 | 5.61  | 1.2E-06 | 4.61  | 0.0375  | PREDICTED: Elaeis guineensis putative receptor protein kinase ZmPK1 (LOC105044537), mRNA                                                         |
| GlaUn085168 | 0.47  | 0.03825 | 0.41  | 5.2E-05 | -                                                                                                                                                |
| GlaUn085203 | 18.31 | 0.00068 | 3.77  | 0.02216 | -                                                                                                                                                |
| GlaUn085204 | 11.26 | 0.00179 | 4.42  | 0.00053 | -                                                                                                                                                |
| GlaUn085265 | 3.31  | 0.00258 | 3.04  | 3.6E-08 | PREDICTED: Nelumbo nucifera U-box domain-containing protein 17 (LOC104586555), mRNA                                                              |
| GlaUn085459 | 3.41  | 0.00056 | 6.26  | 1.6E-13 | PREDICTED: Brachypodium distachyon putative histone-lysine N-methyltransferase PRDM6 (LOC100842321), mRNA                                        |
| GlaUn085756 | 0.46  | 0.00704 | 0.12  | 4.8E-11 | -                                                                                                                                                |
| GlaUn086047 | 13.03 | 0.01874 | 4.77  | 0.00662 | PREDICTED: Elaeis guineensis receptor-like protein kinase 5 (LOC105041917), mRNA                                                                 |
| GlaUn086163 | 0.37  | 0.00073 | 0.27  | 1.6E-07 | -                                                                                                                                                |
| GlaUn086164 | 0.3   | 0.02242 | 0.33  | 0.04592 | -                                                                                                                                                |
| GlaUn086165 | 0.37  | 0.00055 | 0.37  | 2.4E-05 | -                                                                                                                                                |
| GlaUn086166 | 0.4   | 0.00114 | 0.29  | 4.4E-08 | -                                                                                                                                                |
| GlaUn086221 | 2.87  | 0.01863 | 2.67  | 1.6E-05 | PREDICTED: Phoenix dactylifera arginine decarboxylase-like (LOC103705463), transcript variant X2, mRNA                                           |
| GlaUn086226 | 11.99 | 0.00045 | 2.75  | 0.01848 | PREDICTED: Musa acuminata subsp. malaccensis receptor-like protein kinase HSL1 (LOC103969398), mRNA                                              |
| GlaUn086892 | 2.58  | 8.7E-08 | 0.14  | 4.9E-22 | -                                                                                                                                                |
| GlaUn086893 | 2.46  | 2.7E-06 | 0.13  | 6.7E-17 | -                                                                                                                                                |
| GlaUn086936 | 2.56  | 0.00029 | 0.06  | 2.6E-23 | -                                                                                                                                                |
| GlaUn086938 | 2.13  | 0.03369 | 0.16  | 4.4E-09 | Daucus carota Top1beta gene, promoter region                                                                                                     |
| GlaUn086941 | 2.2   | 0.00061 | 0.16  | 8.7E-17 | Eriobotrya japonica clone sssrEJ092 microsatellite sequence                                                                                      |
| GlaUn087126 | 3.49  | 0.00949 | 11.4  | 3.2E-15 | PREDICTED: Phoenix dactylifera probable alpha,alpha-trehalose-phosphate synthase [UDP-forming] 9 (LOC103699387), transcript variant X2, misc_RNA |
| GlaUn087127 | 3.14  | 0.01937 | 13.11 | 1.5E-16 | PREDICTED: Phoenix dactylifera probable alpha,alpha-trehalose-phosphate synthase [UDP-forming] 9 (LOC103699387), transcript variant X2, misc_RNA |
| GlaUn087128 | 4.95  | 0.00804 | 10.61 | 5.9E-27 | -                                                                                                                                                |
| GlaUn087130 | 3.71  | 0.04467 | 12.68 | 5.4E-15 | -                                                                                                                                                |
| GlaUn087243 | 0.4   | 0.00041 | 0.48  | 0.00423 | Arabidopsis thaliana chromosome 3, complete sequence                                                                                             |
| GlaUn087407 | 53.57 | 0.03424 | 5.48  | 2.4E-07 | PREDICTED: Elaeis guineensis L-ascorbate oxidase homolog (LOC105042624), mRNA                                                                    |
| GlaUn087409 | 3.14  | 0.00503 | 2.19  | 0.01741 | PREDICTED: Elaeis guineensis glutathione S-transferase U17-like (LOC105043366), transcript variant X2, mRNA                                      |
| GlaUn087586 | 2.52  | 0.0296  | 19.08 | 1.2E-20 | PREDICTED: Phoenix dactylifera anthocyanidin 3-O-glucosyltransferase 4-like (LOC103710378), mRNA                                                 |
| GlaUn087587 | 2.4   | 0.01317 | 20.26 | 1E-16   | PREDICTED: Phoenix dactylifera anthocyanidin 3-O-glucosyltransferase 4-like (LOC103710378), mRNA                                                 |
| GlaUn087657 | 0.22  | 0.02413 | 11.61 | 1.5E-09 | -                                                                                                                                                |
| GlaUn088256 | 61.05 | 0.00123 | 3.64  | 3.2E-06 | PREDICTED: Musa acuminata subsp. malaccensis uncharacterized LOC103992886 (LOC103992886), mRNA                                                   |
| GlaUn088259 | 26.03 | 0.03528 | 3.95  | 0.00292 | PREDICTED: Musa acuminata subsp. malaccensis uncharacterized LOC103992886 (LOC103992886), mRNA                                                   |
| GlaUn088301 | 3.11  | 0.00214 | 10.78 | 2.3E-19 | PREDICTED: Musa acuminata subsp. malaccensis cytochrome P450 71A1-like (LOC103985373), mRNA                                                      |
| GlaUn088377 | 43.21 | 0.00121 | 0.22  | 0.03595 | PREDICTED: Musa acuminata subsp. malaccensis probable lipxygenase 6 (LOC103968512), mRNA                                                         |
| GlaUn088384 | 0.49  | 0.01211 | 0.35  | 6.4E-09 | PREDICTED: Nelumbo nucifera uncharacterized LOC104592353 (LOC104592353), mRNA                                                                    |
| GlaUn088540 | 2.67  | 0.03373 | 2.27  | 0.01642 | -                                                                                                                                                |
| GlaUn088610 | 0.16  | 4.3E-06 | 34.03 | 3.4E-19 | Vigna angularis var. angularis DNA, chromosome 1, almost complete sequence, cultivar: Shumari                                                    |
| GlaUn088906 | 0.43  | 0.04401 | 0.4   | 0.00114 | -                                                                                                                                                |
| GlaUn088914 | 7.85  | 2.6E-16 | 8.09  | 1.1E-24 | PREDICTED: Elaeis guineensis glycerol-3-phosphate 2-O-acyltransferase 6 (LOC105046257), mRNA                                                     |
| GlaUn088916 | 6.69  | 2.7E-12 | 8.33  | 9.5E-25 | PREDICTED: Prunus mume glycerol-3-phosphate 2-O-acyltransferase 6 (LOC103338081), mRNA                                                           |
| GlaUn088917 | 3.99  | 0.00022 | 8.54  | 8.2E-21 | PREDICTED: Elaeis guineensis glycerol-3-phosphate 2-O-acyltransferase 6 (LOC105046257), mRNA                                                     |

|             |       |         |       |         |                                                                                                                                                                                                                                                   |
|-------------|-------|---------|-------|---------|---------------------------------------------------------------------------------------------------------------------------------------------------------------------------------------------------------------------------------------------------|
| GlaUn089118 | 3.87  | 0.00084 | 3.56  | 4.5E-07 | PREDICTED: <i>Musa acuminata</i> subsp. <i>malaccensis</i> anthocyanin 3'-O-beta-glucosyltransferase-like (LOC103989223), mRNA                                                                                                                    |
| GlaUn089215 | 6.87  | 3.6E-13 | 0.43  | 1.7E-05 | PREDICTED: <i>Phoenix dactylifera</i> proline-rich receptor-like protein kinase PERK3 (LOC103717896), mRNA                                                                                                                                        |
| GlaUn089269 | 5.92  | 0.0005  | 3.96  | 0.00505 | -                                                                                                                                                                                                                                                 |
| GlaUn089717 | 30.72 | 2.2E-10 | 0.25  | 0.00016 | -                                                                                                                                                                                                                                                 |
| GlaUn089718 | 21.19 | 4.5E-10 | 0.28  | 0.00013 | -                                                                                                                                                                                                                                                 |
| GlaUn089728 | 3.05  | 0.00693 | 2.15  | 0.00047 | -                                                                                                                                                                                                                                                 |
| GlaUn089733 | 17.53 | 4.3E-06 | 0.29  | 0.00121 | -                                                                                                                                                                                                                                                 |
| GlaUn089758 | 2     | 0.00036 | 0.18  | 5.4E-21 | -                                                                                                                                                                                                                                                 |
| GlaUn089759 | 2.19  | 1.5E-05 | 0.2   | 3.8E-16 | -                                                                                                                                                                                                                                                 |
| GlaUn089760 | 2.06  | 5.7E-05 | 0.2   | 1.7E-15 | -                                                                                                                                                                                                                                                 |
| GlaUn089762 | 2.21  | 1.7E-05 | 0.18  | 2.6E-22 | -                                                                                                                                                                                                                                                 |
| GlaUn089763 | 2.09  | 0.00011 | 0.18  | 7.7E-21 | -                                                                                                                                                                                                                                                 |
| GlaUn090024 | 2.11  | 0.0008  | 0.15  | 9.7E-19 | -                                                                                                                                                                                                                                                 |
| GlaUn090026 | 2.02  | 0.00017 | 0.15  | 1.7E-25 | -                                                                                                                                                                                                                                                 |
| GlaUn090038 | 2.5   | 0.04415 | 0.1   | 1.9E-08 | -                                                                                                                                                                                                                                                 |
| GlaUn090039 | 2.79  | 0.0214  | 0.03  | 7.9E-11 | -                                                                                                                                                                                                                                                 |
| GlaUn090040 | 2.71  | 0.00083 | 0.09  | 1E-14   | -                                                                                                                                                                                                                                                 |
| GlaUn090234 | 0.4   | 0.04928 | 0.47  | 0.03372 | -                                                                                                                                                                                                                                                 |
| GlaUn090994 | 0.42  | 0.04367 | 0.11  | 2.5E-08 | -                                                                                                                                                                                                                                                 |
| GlaUn091310 | 2.28  | 0.03636 | 2.73  | 0.00068 | PREDICTED: <i>Elaeis guineensis</i> pentatricopeptide repeat-containing protein At2g02980 (LOC105041736), mRNA<br>PREDICTED: <i>Phoenix dactylifera</i> probable LRR receptor-like serine/threonine-protein kinase At4g37250 (LOC103716219), mRNA |
| GlaUn091423 | 0.26  | 3E-05   | 29.41 | 9.4E-52 | PREDICTED: <i>Elaeis guineensis</i> probable LRR receptor-like serine/threonine-protein kinase At4g37250 (LOC105050162), mRNA                                                                                                                     |
| GlaUn091424 | 0.29  | 0.0001  | 12.9  | 9E-33   | PREDICTED: <i>Phoenix dactylifera</i> probable LRR receptor-like serine/threonine-protein kinase At4g37250 (LOC103716219), mRNA                                                                                                                   |
| GlaUn091425 | 0.24  | 2.7E-05 | 43.49 | 1.7E-59 | PREDICTED: <i>Elaeis guineensis</i> probable LRR receptor-like serine/threonine-protein kinase At4g37250 (LOC105050162), mRNA                                                                                                                     |
| GlaUn091426 | 0.34  | 0.00389 | 9.7   | 4.7E-16 | PREDICTED: <i>Phoenix dactylifera</i> probable LRR receptor-like serine/threonine-protein kinase At4g37250 (LOC103716219), mRNA                                                                                                                   |
| GlaUn091427 | 0.25  | 1.7E-06 | 27.84 | 3.4E-51 | PREDICTED: <i>Phoenix dactylifera</i> probable LRR receptor-like serine/threonine-protein kinase At4g37250 (LOC103716219), mRNA                                                                                                                   |
| GlaUn091428 | 0.27  | 8.3E-06 | 16.44 | 3.5E-38 | PREDICTED: <i>Musa acuminata</i> subsp. <i>malaccensis</i>                                                                                                                                                                                        |
| GlaUn091574 | 4.61  | 0.01366 | 25.75 | 0.00663 | phenylpropanoylacyl-CoA synthase (LOC103975557), mRNA                                                                                                                                                                                             |
| GlaUn091575 | 2     | 0.02638 | 35.81 | 8.6E-05 | <i>Aquilaria sinensis</i> chalcone synthase (CHS2) mRNA, complete cds                                                                                                                                                                             |
| GlaUn091962 | 0.14  | 0.02076 | 30.55 | 1.2E-08 | PREDICTED: <i>Phoenix dactylifera</i> leucine-rich repeat receptor-like serine/threonine-protein kinase BAM1 (LOC103704810), PREDICTED: <i>Elaeis guineensis</i> uncharacterized                                                                  |
| GlaUn092001 | 0.46  | 0.02585 | 0.46  | 0.00013 | LOC105039883 (LOC105039883), transcript variant X2, mRNA                                                                                                                                                                                          |
| GlaUn092303 | 6.32  | 0.01516 | 4.13  | 8.1E-08 | -                                                                                                                                                                                                                                                 |
| GlaUn092304 | 6.25  | 0.01663 | 3.25  | 9.9E-05 | <i>Cocos nucifera</i> serine-threonine kinase STK6 mRNA, complete cds                                                                                                                                                                             |
| GlaUn092305 | 6.24  | 0.0001  | 3.59  | 3.4E-06 | -                                                                                                                                                                                                                                                 |
| GlaUn092355 | 26.46 | 0.00186 | 0.2   | 0.01393 | -                                                                                                                                                                                                                                                 |
| GlaUn092356 | 40.32 | 0.00366 | 0.19  | 0.03331 | -                                                                                                                                                                                                                                                 |
| GlaUn092357 | 25.45 | 0.00175 | 0.16  | 0.00874 | -                                                                                                                                                                                                                                                 |
| GlaUn092478 | 10.27 | 0.00205 | 2.38  | 0.04135 | <i>Oryza sativa</i> Japonica Group DNA, chromosome 5, cultivar: Nipponbare, complete sequence<br>PREDICTED: <i>Pyrus x bretschneideri</i> receptor-like protein kinase                                                                            |
| GlaUn092515 | 5.48  | 0.02424 | 4.58  | 3.1E-12 | HAIKU2 (LOC103947969), mRNA<br>PREDICTED: <i>Elaeis guineensis</i> receptor-like protein kinase                                                                                                                                                   |
| GlaUn092516 | 4.88  | 0.02726 | 4.6   | 4.4E-10 | HAIKU2 (LOC105061016), mRNA                                                                                                                                                                                                                       |
| GlaUn092644 | 0.31  | 3.8E-05 | 0.14  | 2.5E-07 | -                                                                                                                                                                                                                                                 |
| GlaUn093084 | 0.12  | 0.01289 | 72.4  | 0.0004  | PREDICTED: <i>Musa acuminata</i> subsp. <i>malaccensis</i> auxin transporter-like protein 1 (LOC103990196), mRNA                                                                                                                                  |
| GlaUn093087 | 63.43 | 6.1E-45 | 0.08  | 4.3E-29 | -                                                                                                                                                                                                                                                 |
| GlaUn093252 | 2.66  | 1E-06   | 2.33  | 9.4E-05 | PREDICTED: <i>Eucalyptus grandis</i> chaperone protein ClpB3, chloroplastic (LOC104435988), mRNA                                                                                                                                                  |

|             |       |         |      |         |                                                                                                       |
|-------------|-------|---------|------|---------|-------------------------------------------------------------------------------------------------------|
| GlaUn093253 | 3.13  | 3E-07   | 2.05 | 0.0027  | PREDICTED: Sesamum indicum uncharacterized<br>LOC105155881 (LOC105155881), mRNA                       |
| GlaUn093295 | 2.12  | 0.04722 | 2.43 | 0.00267 | Vitis vinifera contig VV78X195327.12, whole genome shotgun<br>sequence                                |
| GlaUn093540 | 4.92  | 0.02812 | 3.68 | 2.2E-07 | Gladiolus hybrid cultivar cultivar Rose Supreme ABA 8'-<br>hydroxylase 1 (CYP707A1) mRNA, partial cds |
| GlaUn093620 | 2.72  | 0.00597 | 0.13 | 1.4E-09 | -                                                                                                     |
| GlaUn097131 | 4.42  | 0.02206 | 9.77 | 2.7E-06 | -                                                                                                     |
| GlaUn098857 | 0.25  | 0.00046 | 0.02 | 0.00282 | -                                                                                                     |
| GlaUn100459 | 2.07  | 0.02427 | 0.2  | 4.5E-09 | -                                                                                                     |
| GlaUn101375 | 2.2   | 0.01586 | 0.11 | 4E-12   | PREDICTED: Phoenix dactylifera L-ascorbate oxidase homolog<br>(LOC103702183), mRNA                    |
| GlaUn101712 | 4.93  | 0.03916 | 3.12 | 0.00496 | -                                                                                                     |
| GlaUn104526 | 5.5   | 0.04463 | 3.4  | 0.00317 | -                                                                                                     |
| GlaUn105669 | 7.86  | 0.00702 | 0.38 | 0.03635 | -                                                                                                     |
| GlaUn106028 | 2.03  | 0.00033 | 0.23 | 5E-12   | -                                                                                                     |
| GlaUn106259 | 0.14  | 6.6E-11 | 0.4  | 0.01122 | -                                                                                                     |
| GlaUn106640 | 7.23  | 0.03434 | 2.39 | 0.02498 | -                                                                                                     |
| GlaUn111155 | 0.47  | 0.04572 | 0.15 | 1.4E-14 | -                                                                                                     |
| GlaUn111575 | 4.16  | 0.01874 | 3.28 | 0.04869 | -                                                                                                     |
| GlaUn111911 | 0.4   | 0.00012 | 0.03 | 3.9E-17 | -                                                                                                     |
| GlaUn113783 | 0.27  | 0.01332 | 0.12 | 0.00611 | -                                                                                                     |
| GlaUn115355 | 0.36  | 0.00443 | 0.12 | 5.8E-08 | -                                                                                                     |
| GlaUn116606 | 6.92  | 8.6E-06 | 2.6  | 0.02756 | -                                                                                                     |
| GlaUn117191 | 4.87  | 1E-04   | 0.05 | 1.8E-10 | -                                                                                                     |
| GlaUn117239 | 6.1   | 0.0287  | 14.5 | 2.8E-14 | -                                                                                                     |
| GlaUn117439 | 68.71 | 0.03564 | 6.06 | 1.8E-05 | -                                                                                                     |
| GlaUn117844 | 3.17  | 0.01858 | 0    | 9.2E-15 | -                                                                                                     |
| GlaUn117845 | 3.21  | 0.01991 | 0    | 6.9E-15 | -                                                                                                     |
