# Supplementary material for: GhNAC83 inhibits corm dormancy release by regulating ABA signaling and cytokinin biosynthesis in Gladiolus hybridus
Source: PubMed Central journal article supplement (PMC6382327; doi:10.1093/jxb/ery428), 2018-12-05
Supplement: ery428_suppl_supplementary_table_s3.pdf [file ery428_suppl_supplementary_table_s3.pdf]

**Table S3.** List of differentially expressed cytokinins- and ABA- related genes

| Gene ID                  | KEGG ID | putative function | WD VS DD |                     | ED VS WD |                     |  |
|--------------------------|---------|-------------------|----------|---------------------|----------|---------------------|--|
|                          |         |                   | Fold     | Log <sub>2</sub> FC | Fold     | Log <sub>2</sub> FC |  |
| <b>Zeatin metabolism</b> |         |                   |          |                     |          |                     |  |
| GlaUn027415              | K13495  | CISZOG            | 21.67    | 0.809970186         | 20.86    | 4.22E-07            |  |
| GlaUn049027              | K13495  | CISZOG            | 0.88     |                     | 3.83     | 0.003108116         |  |
| GlaUn011664              | K13495  | CISZOG            | 0.72     | 0.891772388         | 3.27     | 3.66E-05            |  |
| GlaUn091771              | K13495  | CISZOG            | 1.38     | 0.731124316         | 5.62     | 5.67E-09            |  |
| GlaUn033550              | K13495  | CISZOG            | 2.1      | 0.872435129         | 25.96    | 2.94E-37            |  |
| GlaUn074244              | K13495  | CISZOG            | 2.67     | 0.684488876         | 27.39    | 3.59E-58            |  |
| GlaUn049030              | K13495  | CISZOG            | 0.94     |                     | 2.2      | 0.046310478         |  |
| GlaUn049028              | K13495  | CISZOG            | 0.98     |                     | 4.32     | 9.28E-06            |  |
| GlaUn027416              | K13495  | CISZOG            | 2.1      |                     | 35.67    | 9.63E-07            |  |
| GlaUn091770              | K13495  | CISZOG            | 6        | 0.553867568         | 16.62    | 1.99E-12            |  |
| GlaUn091769              | K13495  | CISZOG            | 1.24     | 0.416584357         | 5.86     | 3.10E-19            |  |
| GlaUn065024              | K13495  | CISZOG            | 0.54     | 0.640582769         | 64.25    | 1.25E-76            |  |
| GlaUn108585              | K13495  | CISZOG            | 9.67     | 0.998003285         | 26.72    | 0.001835285         |  |
| GlaUn057969              | K13493  | UGT76C            | 0.26     | 0.257540159         | 4.58     | 0.025443248         |  |
| GlaUn003748              | K13493  | UGT76C            | 0.91     |                     | 5.65     | 3.84E-18            |  |
| GlaUn063553              | K13493  | UGT76C            | 0.43     | 0.049841553         | 2.37     | 0.009952164         |  |
| GlaUn071508              | K13493  | UGT76C            | 4.51     | 9.20E-12            | 16.12    | 8.47E-11            |  |
| GlaUn083354              | K13493  | UGT76C            | 0.83     |                     | 5.92     | 2.22E-16            |  |
| GlaUn071511              | K13493  | UGT76C            | 4.58     | 0.227672272         | 5.32     | 6.04E-12            |  |
| GlaUn071509              | K13493  | UGT76C            | 1.36     | 0.938977157         | 72.92    | 2.96E-17            |  |
| GlaUn031858              | K13493  | UGT76C            | 0.52     |                     | 60.87    | 5.89E-06            |  |
| GlaUn079045              | K13493  | UGT76C            | 1.72     | 0.456880791         | 6.49     | 1.11E-08            |  |
| GlaUn048661              | K13493  | UGT76C            | 1.52     | 0.078265988         | 0.45     | 1.14E-05            |  |
| GlaUn020036              | K13493  | UGT76C            | 1.77     | 0.978487881         | 11.03    | 3.27E-05            |  |
| GlaUn084925              | K13493  | UGT76C            | 0.42     | 0.150345729         | 2.64     | 0.015203105         |  |
| GlaUn063555              | K13493  | UGT76C            | 0.79     |                     | 4.28     | 3.78E-05            |  |
| GlaUn071512              | K13493  | UGT76C            | 5.47     | 0.239485393         | 5.62     | 6.15E-08            |  |
| GlaUn071510              | K13493  | UGT76C            | 1.36     | 0.215378969         | 7.82     | 7.75E-17            |  |
| GlaUn054456              | K10760  | AtIPT             | 0.29     |                     | 181.5    | 9.52E-19            |  |
| GlaUn006126              | K10760  | AtIPT             | 0.07     | 0.959717144         | 87       | 0.140267289         |  |
| GlaUn027324              | K00791  | TRIT1             | 2.32     | 0.802169037         | 2.35     | 0.275355808         |  |
| GlaUn052173              | K10717  | CYP735A           | 1.04     | 0.90078541          | 1.14     | 1                   |  |
| GlaUn052168              | K10717  | CYP735A           | 1.05     | 0.891772388         | 1.12     | 0.972862766         |  |
| GlaUn048874              | K10717  | CYP735A           | 0.75     |                     | 1        | NA                  |  |
| GlaUn067098              | K10717  | CYP735A           | 4.47     | 0.598939194         | 9.33     | 0.021857261         |  |
| GlaUn052172              | K10717  | CYP735A           | 1.04     | 0.912205011         | 0.95     | 0.485893671         |  |
| GlaUn067100              | K10717  | CYP735A           | 5        |                     | 14.6     | 0.211383408         |  |
| GlaUn069615              | K10717  | CYP735A           | 0.65     | 0.733963262         | 2.25     | 0.000211978         |  |
| GlaUn116903              | K00279  | CKX               | 0.21     |                     | 28       | 0.413403935         |  |
| GlaUn068688              | K00279  | CKX               | 2.51     | 0.000176893         | 0.97     | 0.587995997         |  |
| GlaUn003773              | K00279  | CKX               | 1.92     | 0.004098349         | 0.61     | 0.006077591         |  |
| GlaUn083844              | K00279  | CKX               | 1.88     | 0.005372696         | 0.57     | 0.002085457         |  |
| GlaUn056220              | K00279  | CKX               | 1.75     | 0.699687815         | 0.46     | 0.212034331         |  |
| GlaUn011167              | K00279  | CKX               | 0.12     | 0.640817398         | 23       | 0.316277335         |  |
| GlaUn073350              | K00279  | CKX               | 0.3      | 0.587123745         | 36.9     | 2.26E-05            |  |
| GlaUn073352              | K00279  | CKX               | 3.33     |                     | 16.3     | 0.094611398         |  |
| GlaUn034211              | K00279  | CKX               | 1        | NA                  | 25       | 0.148592335         |  |
| GlaUn073351              | K00279  | CKX               | 3.33     |                     | 18.3     | 0.080985632         |  |
| <b>ABA metabolism</b>    |         |                   |          |                     |          |                     |  |
| GlaUn054029              | K09838  | ABA1              | 0.76     | 0.945475832         | 11.26    | 4.94E-27            |  |
| GlaUn064550              | K09838  | ABA1              | 0.92     |                     | 18.71    | 1.10E-10            |  |
| GlaUn029851              | K09838  | ABA1              | 0.53     |                     | 153.78   | 0.00267479          |  |
| GlaUn000657              | K09838  | ABA1              | 0.83     |                     | 29.74    | 3.33E-08            |  |
| GlaUn064550              | K09838  | ABA1              | 0.92     |                     | 18.71    | 1.10E-10            |  |
| GlaUn029851              | K09838  | ABA1              | 0.53     |                     | 153.78   | 0.00267479          |  |
| GlaUn054029              | K09838  | ABA1              | 0.76     | 0.945475832         | 11.26    | 4.94E-27            |  |
| GlaUn000657              | K09838  | ABA1              | 0.83     |                     | 29.74    | 3.33E-08            |  |
| GlaUn074529              | K09839  | NPQ1              | 0.79     | 0.963809723         | 0.34     | 5.66E-06            |  |
| GlaUn057783              | K09840  | NCED              | 0.86     |                     | 0.28     | 7.44E-10            |  |
| GlaUn057782              | K09840  | NCED              | 0.94     |                     | 0.26     | 5.83E-11            |  |
| GlaUn057784              | K09840  | NCED              | 0.79     | 0.988664655         | 0.21     | 1.95E-06            |  |
| GlaUn093539              | K09843  | CYP707A           | 4.85     | 0.058192747         | 3.53     | 5.71E-06            |  |
| GlaUn093540              | K09843  | CYP707A           | 4.92     | 0.028124268         | 3.68     | 2.17E-07            |  |
| GlaUn093541              | K09843  | CYP707A           | 5.07     | 0.059292817         | 3.29     | 2.64E-05            |  |
| GlaUn061060              | K09843  | CYP707A           | 5.41     | 0.013403302         | 3.6      | 3.86E-08            |  |
| GlaUn037869              | K09843  | CYP707A           | 16.63    | 0.081004548         | 5.28     | 2.28E-07            |  |
| GlaUn061059              | K09843  | CYP707A           | 14.38    | 0.148000509         | 4.79     | 3.95E-07            |  |
| GlaUn061061              | K09843  | CYP707A           | 14.38    | 0.146081177         | 4.91     | 6.88E-08            |  |
| GlaUn093542              | K09843  | CYP707A           | 4.75     | 0.083734984         | 3.62     | 1.33E-06            |  |

|             |        |     |      |             |       |             |
|-------------|--------|-----|------|-------------|-------|-------------|
| GlaUn018811 | K14595 | AOG | 1.65 | 0.786475581 | 5.03  | 0.000153964 |
| GlaUn087588 | K14595 | AOG | 1.67 | 0.629341063 | 24.79 | 1.08E-38    |
| GlaUn018812 | K14595 | AOG | 1.11 | 1           | 6.11  | 1.30E-05    |
| GlaUn050755 | K14595 | AOG | 1.15 | 1           | 3.75  | 0.008583359 |
| GlaUn087589 | K14595 | AOG | 2.72 | 0.126094085 | 22.07 | 8.02E-20    |
| GlaUn021852 | K14595 | AOG | 2.42 | 0.938382443 | 10.75 | 1.46E-06    |
| GlaUn002060 | K14595 | AOG | 1.14 | 0.901459652 | 3.74  | 1.65E-08    |
| GlaUn001239 | K14595 | AOG | 1.95 | 0.544832236 | 8.78  | 9.74E-08    |
| GlaUn002059 | K14595 | AOG | 1.22 | 0.849941492 | 6.33  | 1.86E-16    |
| GlaUn089119 | K14595 | AOG | 1.68 | 0.044148362 | 2.15  | 0.00087865  |
| GlaUn089118 | K14595 | AOG | 3.87 | 0.000837127 | 3.56  | 4.51E-07    |
| GlaUn072422 | K14595 | AOG | 1.33 | 0.839340688 | 40.7  | 4.16E-58    |
| GlaUn072424 | K14595 | AOG | 1.1  | 0.981508673 | 10.93 | 5.32E-18    |
| GlaUn081393 | K14595 | AOG | 3.06 | 0.012618162 | 3.81  | 0.005923883 |
| GlaUn072421 | K14595 | AOG | 1.43 | 0.790567311 | 38.38 | 3.46E-56    |

#### Zeatin signaling

|             |        |       |      |             |       |             |
|-------------|--------|-------|------|-------------|-------|-------------|
| GlaUn048853 | K14489 | CRE1  | 0.69 | 0.8134011   | 0.18  | 1.68E-06    |
| GlaUn067216 | K14489 | CRE1  | 0.81 | 0.936101126 | 0.19  | 2.01E-21    |
| GlaUn052261 | K14489 | CRE1  | 2    | 1           | 149   | 1.61E-06    |
| GlaUn096053 | K14489 | CRE1  | 1.77 | 0.563476694 | 0.22  | 0.005744931 |
| GlaUn067215 | K14489 | CRE1  | 0.81 | 0.933582723 | 0.19  | 2.82E-21    |
| GlaUn071118 | K14489 | CRE1  | 1.29 | 0.768971803 | 0.34  | 0.003471881 |
| GlaUn002631 | K14489 | CRE1  | 0.81 | 0.934078844 | 0.2   | 3.69E-21    |
| GlaUn048852 | K14489 | CRE1  | 0.71 | 0.874182829 | 0.16  | 5.37E-06    |
| GlaUn076331 | K14494 | ARR-B | 0.99 | 1           | 0.43  | 0.002655296 |
| GlaUn076330 | K14494 | ARR-B | 1.01 | 1           | 0.46  | 0.009067909 |
| GlaUn071707 | K14494 | ARR-B | 1.53 | 0.708152256 | 2.21  | 0.006919047 |
| GlaUn076742 | K14494 | ARR-B | 1    | 0.958958794 | 3.96  | 6.23E-12    |
| GlaUn071709 | K14494 | ARR-B | 1.01 | 0.955189701 | 3.6   | 2.30E-10    |
| GlaUn031176 | K14494 | ARR-B | 1.79 | 0.594139216 | 2.11  | 0.030920306 |
| GlaUn050605 | K14494 | ARR-B | 1.03 | 0.912228299 | 3.47  | 6.85E-09    |
| GlaUn076736 | K14494 | ARR-B | 1.01 | 0.950534623 | 3.51  | 1.69E-09    |
| GlaUn092328 | K14494 | ARR-B | 0.74 | 0.717194209 | 0.47  | 2.34E-06    |
| GlaUn009047 | K14494 | ARR-B | 2.1  | 1           | 13.52 | 0.043662317 |
| GlaUn071710 | K14494 | ARR-B | 1.04 | 0.897920974 | 3.44  | 1.86E-09    |
| GlaUn076740 | K14494 | ARR-B | 1.02 | 0.93323267  | 3.51  | 1.69E-09    |
| GlaUn025694 | K14494 | ARR-B | 2.11 | 0.147460299 | 0.14  | 2.63E-06    |
| GlaUn076738 | K14494 | ARR-B | 1    | 0.969103804 | 3.93  | 3.53E-11    |
| GlaUn071708 | K14494 | ARR-B | 1.08 | 0.791436562 | 3.58  | 2.40E-10    |
| GlaUn063865 | K14492 | ARR-A | 0.63 | 0.756494277 | 3.11  | 0.012767719 |
| GlaUn063867 | K14492 | ARR-A | 0.68 | 0.936101126 | 3.17  | 0.028899304 |
| GlaUn032468 | K14492 | ARR-A | 0.18 | 0.245284503 | 9.78  | 0.020051737 |
| GlaUn002436 | K14492 | ARR-A | 0.7  | 0.894493541 | 2.82  | 0.007625923 |
| GlaUn032466 | K14492 | ARR-A | 0.18 | 0.165523149 | 9.31  | 0.001669473 |
| GlaUn063866 | K14492 | ARR-A | 0.67 | 0.830749691 | 2.99  | 0.005669633 |
| GlaUn032469 | K14492 | ARR-A | 0.16 | 0.194378676 | 9.88  | 0.027788561 |
| GlaUn010457 | K14492 | ARR-A | 1.23 | 0.90804015  | 3.17  | 0.003705919 |
| GlaUn051122 | K14492 | ARR-A | 2.47 | 0.01464517  | 0.38  | 9.44E-06    |
| GlaUn032467 | K14492 | ARR-A | 0.17 | 0.129552098 | 9.12  | 0.00201856  |
| GlaUn051121 | K14492 | ARR-A | 1.89 | 0.236966948 | 0.34  | 5.09E-06    |

#### ABA signaling

|             |        |       |      |             |      |             |
|-------------|--------|-------|------|-------------|------|-------------|
| GlaUn025488 | K14496 | PYL   | 0.57 | 0.125515422 | 0.44 | 0.000512511 |
| GlaUn030679 | K14497 | PP2C  | 5.23 | 2.59E-16    | 2.74 | 0.00000348  |
| GlaUn052869 | K14497 | PP2C  | 4.05 | 3.88E-11    | 2.28 | 0.000453825 |
| GlaUn072818 | K14497 | PP2C  | 2.36 | 7.0588E-07  | 0.32 | 1.12729E-12 |
| GlaUn081699 | K14497 | PP2C  | 2.15 | 4.78E-05    | 0.11 | 1.07E-30    |
| GlaUn081704 | K14497 | PP2C  | 3.78 | 0.00219374  | 0.44 | 0.003994378 |
| GlaUn072819 | K14497 | PP2C  | 2.99 | 1.83E-09    | 0.31 | 3.92E-13    |
| GlaUn072820 | K14497 | PP2C  | 3.11 | 4.40E-09    | 0.31 | 3.32E-13    |
| GlaUn081707 | K14497 | PP2C  | 4.17 | 0.015785708 | 0.47 | 0.039210772 |
| GlaUn081701 | K14497 | PP2C  | 2.16 | 3.74E-05    | 0.11 | 1.75E-30    |
| GlaUn081702 | K14497 | PP2C  | 2.16 | 0.001313211 | 0.13 | 2.43E-17    |
| GlaUn026473 | K14497 | PP2C  | 1.8  | 0.001747729 | 0.38 | 4.20E-09    |
| GlaUn081703 | K14497 | PP2C  | 2.43 | 1.69E-05    | 0.19 | 2.16E-16    |
| GlaUn078852 | K14497 | PP2C  | 2.01 | 0.029069561 | 4.18 | 4.70E-13    |
| GlaUn072816 | K14497 | PP2C  | 2.95 | 1.01E-10    | 0.3  | 1.12E-13    |
| GlaUn072817 | K14497 | PP2C  | 3.14 | 9.03E-09    | 0.31 | 2.27E-13    |
| GlaUn081705 | K14497 | PP2C  | 4.14 | 0.018886338 | 0.38 | 0.014655617 |
| GlaUn081706 | K14497 | PP2C  | 4.04 | 0.017524497 | 0.38 | 0.012921162 |
| GlaUn081700 | K14497 | PP2C  | 2.13 | 6.08E-05    | 0.11 | 5.43E-30    |
| GlaUn081698 | K14497 | PP2C  | 2.21 | 2.54E-05    | 0.11 | 1.47E-30    |
| GlaUn026955 | K14498 | SnRK2 | 0.93 | 1           | 3.71 | 2.53E-09    |
| GlaUn015304 | K14498 | SnRK2 | 0.54 | 0.87711972  | 4.39 | 0.013446056 |
| GlaUn064508 | K14498 | SnRK2 | 0.9  | 1           | 2.01 | 0.005181329 |

|             |        |       |      |             |       |             |
|-------------|--------|-------|------|-------------|-------|-------------|
| GlaUn069238 | K14498 | SnRK2 | 1.02 | 0.942194783 | 2.34  | 0.00033931  |
| GlaUn031116 | K14498 | SnRK2 | 0.81 | 0.934058657 | 7.83  | 3.34E-26    |
| GlaUn030699 | K14498 | SnRK2 | 0.92 | 1           | 2.2   | 0.001777291 |
| GlaUn069237 | K14498 | SnRK2 | 1.02 | 0.916521467 | 2.6   | 7.34E-06    |
| GlaUn015862 | K14498 | SnRK2 | 1.32 | 0.351505314 | 0.22  | 1.40E-12    |
| GlaUn028627 | K14498 | SnRK2 | 0.82 | 1           | 5.53  | 0.000470854 |
| GlaUn035378 | K14432 | ABF   | 0.46 | 0.981508673 | 16.47 | 2.66E-05    |
| GlaUn087511 | K14432 | ABF   | 0.86 | 1           | 3.06  | 5.65E-07    |
| GlaUn077778 | K14432 | ABF   | 0.89 | 1           | 3.79  | 1.04E-09    |
| GlaUn073732 | K14432 | ABF   | 0.8  | 0.953310969 | 2.8   | 3.39E-05    |
| GlaUn067955 | K14432 | ABF   | 2.81 | 0.157776702 | 5.71  | 2.30E-09    |
| GlaUn087510 | K14432 | ABF   | 0.92 | 1           | 2.98  | 6.38E-07    |

---
